# Supplementary material for: A Hierarchical Bayesian Model for Next-Generation Population Genomics
Source: Oxford University Press journal article supplement (doi:10.1534/genetics.110.124693), 2011-01-07
Supplement: figures1.pdf [file figures1.pdf]

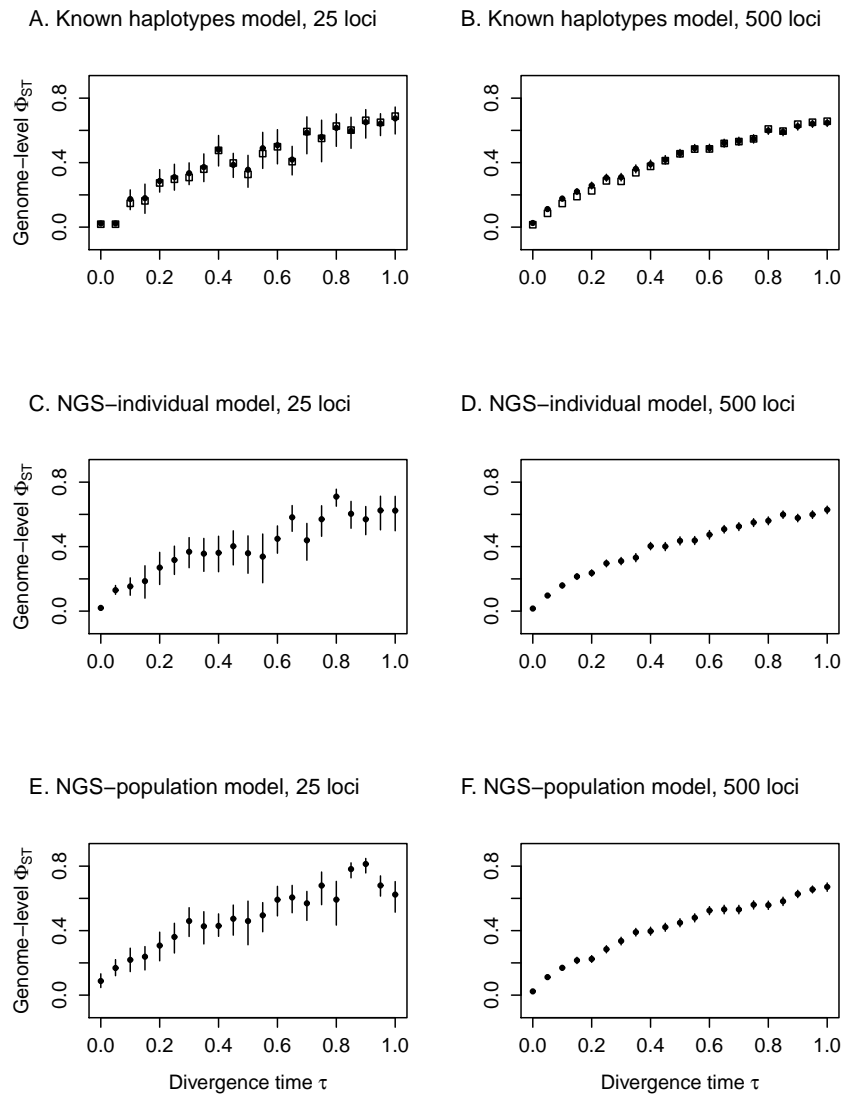

FIGURE S1.—Posterior probability distribution for mean genome-level  $\phi_{ST}$  ( $\mu_{ST}$ ). The median (solid circle), 95% ETPI (vertical lines), and empirical mean  $\phi_{ST}$  (open box, *known haplotypes model*) from a set of simulated data are shown in each plot.
