# Supplementary material for: A Hierarchical Bayesian Model for Next-Generation Population Genomics
Source: Oxford University Press journal article supplement (doi:10.1534/genetics.110.124693), 2011-01-07
Supplement: figures2.pdf [file figures2.pdf]

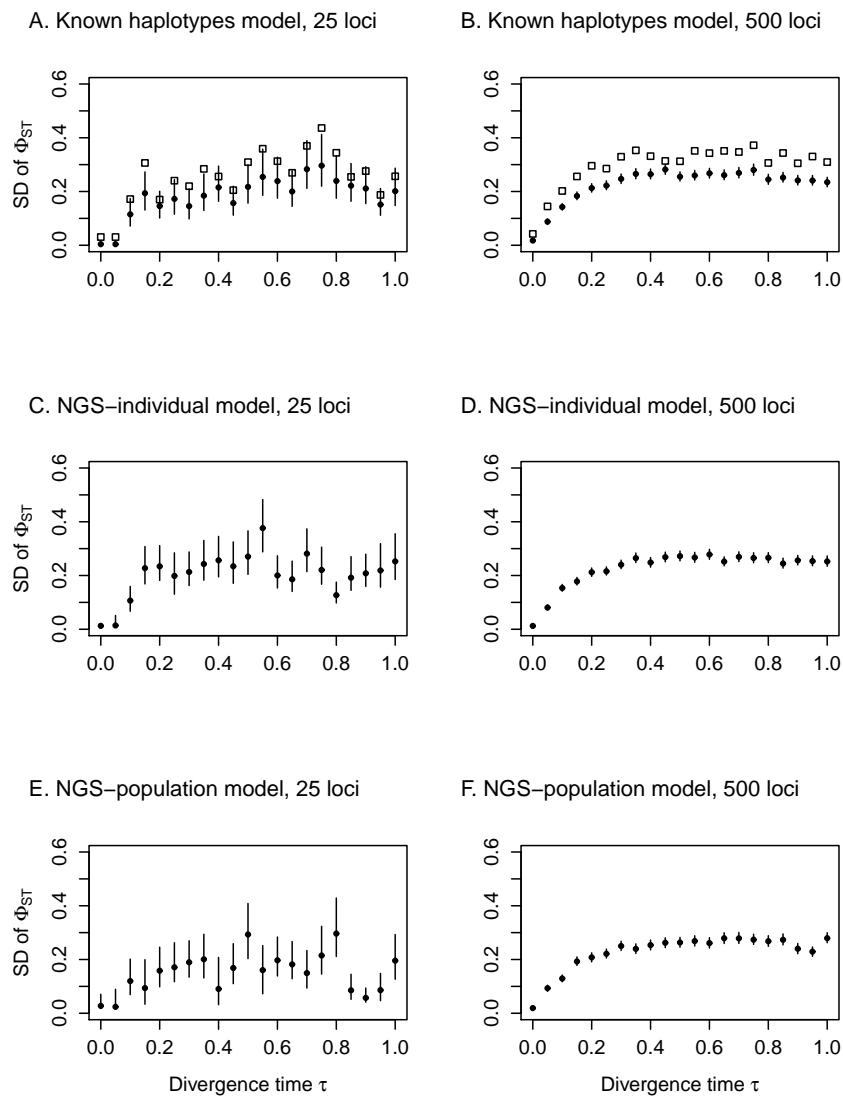

FIGURE S2.—Posterior probability distribution for the standard deviation of the genome-level  $\phi_{ST}$  distribution. The median (solid circle), 95% ETPI (vertical lines), and empirical standard deviation of  $\phi_{ST}$  (open box, known haplotypes model) are shown for each set of simulations.
