# Supplementary material for: A Hierarchical Bayesian Model for Next-Generation Population Genomics
Source: Oxford University Press journal article supplement (doi:10.1534/genetics.110.124693), 2011-01-07
Supplement: figures3.pdf [file figures3.pdf]

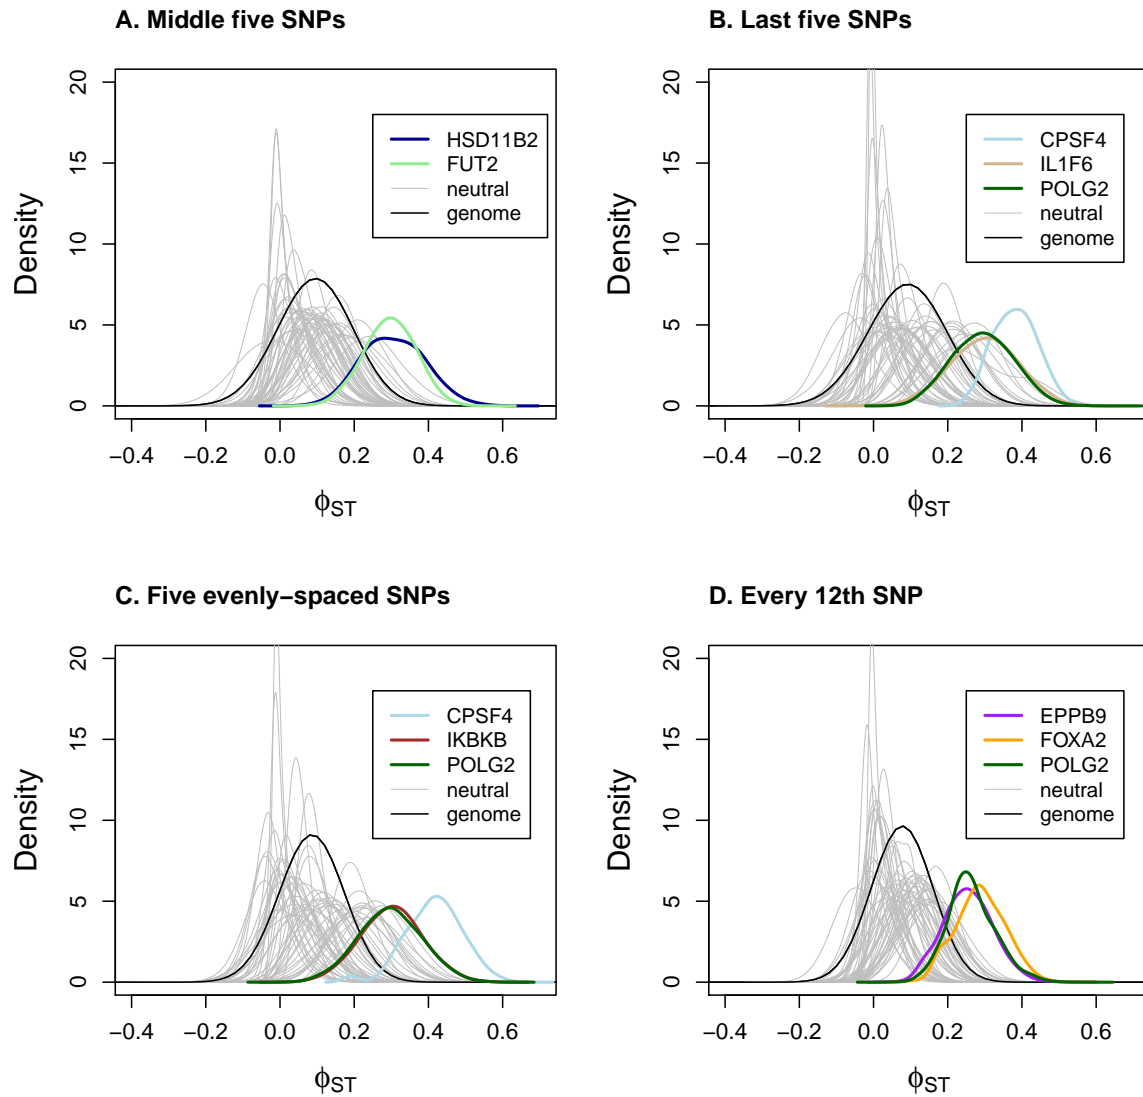

FIGURE S3.—Locus-specific  $\phi_{ST}$  estimates for Africans and Europeans (SeattleSNPs data set). A point estimate of the genome-level  $\phi_{ST}$  distribution (based on the median from the posterior probability distributions of  $\alpha_{ST}$  and  $\beta_{ST}$ ) is denoted with a solid black line. The posterior probability distributions for the outlier loci (colored lines) and 50 additional randomly chosen genetic regions (gray lines) are shown in each plot. Results from the middle five SNPs in each gene (A), the last five SNPs in each gene (B), five evenly spaced SNPs in each gene (C), and every 12<sup>th</sup> in each gene (D) are shown.
