# Supplementary material for: A Hierarchical Bayesian Model for Next-Generation Population Genomics
Source: Oxford University Press journal article supplement (doi:10.1534/genetics.110.124693), 2011-01-07
Supplement: tables2.pdf [file tables2.pdf]

**TABLE S2**  
**Proportion of outlier loci (*NGS-individual model*)**

| <i>S</i> | No. loci | $\tau$ | Neutral   |            |            |           |            |            | Selective Sweep |            |            |           |            |           |            |       |       |        |
|----------|----------|--------|-----------|------------|------------|-----------|------------|------------|-----------------|------------|------------|-----------|------------|-----------|------------|-------|-------|--------|
|          |          |        | $m = 0$   |            |            | $m = 2$   |            |            | $m = 0$         |            |            | $m = 2$   |            |           |            |       |       |        |
|          |          |        | $a = 0.5$ | $a = 0.95$ | $a = 0.95$ | $a = 0.5$ | $a = 0.95$ | $a = 0.95$ | $a = 0.5$       | $a = 0.95$ | $a = 0.95$ | $a = 0.5$ | $a = 0.95$ | $a = 0.5$ | $a = 0.95$ |       |       |        |
| 1        | 25       | 0.25   | 0.009     | 0.022      | 0.000      | 0.000     | 0.013      | 0.009      | 0.000           | 0.000      | 0.000      | 0.000     | 0.000      | 0.050     | 0.150      | 0.000 | 0.000 |        |
|          |          | 0.50   | 0.022     | 0.013      | 0.000      | 0.004     | 0.000      | 0.013      | 0.000           | 0.000      | 0.000      | 0.000     | 0.000      | 0.050     | 0.050      | 0.000 | 0.000 |        |
|          | 500      | 0.25   | 0.030     | 0.017      | 0.009      | 0.004     | 0.013      | 0.017      | 0.000           | 0.000      | 0.000      | 0.000     | 0.000      | 0.100     | 0.050      | 0.000 | 0.000 |        |
|          |          | 0.50   | 0.012     | 0.021      | 0.001      | 0.003     | 0.005      | 0.017      | 0.000           | 0.003      | 0.008      | 0.044     | 0.000      | 0.008     | 0.012      | 0.064 | 0.000 | 0.012  |
|          | 1.00     | 0.25   | 0.023     | 0.016      | 0.003      | 0.002     | 0.011      | 0.019      | 0.000           | 0.002      | 0.016      | 0.036     | 0.004      | 0.000     | 0.008      | 0.064 | 0.000 | 0.000  |
|          |          | 1.00   | 0.031     | 0.007      | 0.008      | 0.001     | 0.011      | 0.018      | 0.000           | 0.002      | 0.036      | 0.004     | 0.008      | 0.000     | 0.028      | 0.076 | 0.000 | 0.008  |
| 3        | 25       | 0.25   | 0.004     | 0.022      | 0.000      | 0.000     | 0.004      | 0.026      | 0.000           | 0.000      | 0.000      | 0.000     | 0.000      | 0.050     | 0.250      | 0.050 | 0.000 | 0.050  |
|          |          | 0.50   | 0.018     | 0.022      | 0.004      | 0.004     | 0.017      | 0.004      | 0.000           | 0.000      | 0.050      | 0.000     | 0.000      | 0.000     | 0.000      | 0.400 | 0.000 | 0.100  |
|          | 500      | 0.25   | 0.043     | 0.009      | 0.000      | 0.000     | 0.009      | 0.009      | 0.000           | 0.000      | 0.000      | 0.000     | 0.000      | 0.000     | 0.100      | 0.250 | 0.000 | 0.0500 |
|          |          | 0.50   | 0.009     | 0.015      | 0.001      | 0.002     | 0.008      | 0.013      | 0.000           | 0.003      | 0.024      | 0.160     | 0.000      | 0.032     | 0.012      | 0.248 | 0.000 | 0.072  |
|          | 1.00     | 0.25   | 0.018     | 0.014      | 0.001      | 0.002     | 0.009      | 0.013      | 0.000           | 0.002      | 0.036      | 0.076     | 0.004      | 0.008     | 0.044      | 0.220 | 0.000 | 0.056  |
|          |          | 1.00   | 0.032     | 0.009      | 0.008      | 0.001     | 0.010      | 0.013      | 0.001           | 0.001      | 0.056      | 0.032     | 0.004      | 0.008     | 0.036      | 0.216 | 0.000 | 0.044  |
| 5        | 25       | 0.25   | 0.000     | 0.000      | 0.000      | 0.000     | 0.004      | 0.000      | 0.000           | 0.000      | 0.000      | 0.000     | 0.000      | 0.000     | 0.850      | 0.000 | 0.350 |        |
|          |          | 0.50   | 0.013     | 0.004      | 0.000      | 0.000     | 0.000      | 0.000      | 0.000           | 0.000      | 0.000      | 0.300     | 0.000      | 0.100     | 0.000      | 0.950 | 0.000 | 0.3000 |
|          | 500      | 0.25   | 0.022     | 0.004      | 0.000      | 0.000     | 0.000      | 0.000      | 0.000           | 0.000      | 0.000      | 0.200     | 0.000      | 0.100     | 0.000      | 0.850 | 0.000 | 0.400  |
|          |          | 0.50   | 0.011     | 0.006      | 0.000      | 0.001     | 0.006      | 0.002      | 0.000           | 0.000      | 0.000      | 0.656     | 0.000      | 0.2888    | 0.000      | 0.888 | 0.000 | 0.440  |
|          | 1.00     | 0.25   | 0.018     | 0.007      | 0.002      | 0.001     | 0.005      | 0.003      | 0.000           | 0.001      | 0.000      | 0.308     | 0.000      | 0.108     | 0.000      | 0.824 | 0.000 | 0.416  |
|          |          | 1.00   | 0.031     | 0.008      | 0.009      | 0.001     | 0.009      | 0.004      | 0.000           | 0.001      | 0.000      | 0.060     | 0.000      | 0.004     | 0.000      | 0.792 | 0.000 | 0.324  |

Mean proportion of neutrally evolving and selected loci over 10 replicates identified as outliers for the *NGS-individual model*.
