# Supplementary material for: A Hierarchical Bayesian Model for Next-Generation Population Genomics
Source: Oxford University Press journal article supplement (doi:10.1534/genetics.110.124693), 2011-01-07
Supplement: tables3.pdf [file tables3.pdf]

**TABLE S3**  
**Proportion of outlier loci (*NGS-population model*)**

| <i>S</i> | No. loci | $\tau$ | Neutral   |            |           |            |           |            | Selective Sweep |            |           |            |           |            |       |       |       |        |
|----------|----------|--------|-----------|------------|-----------|------------|-----------|------------|-----------------|------------|-----------|------------|-----------|------------|-------|-------|-------|--------|
|          |          |        | $m = 0$   |            | $m = 2$   |            | $m = 0$   |            | $m = 2$         |            | $m = 0$   |            | $m = 2$   |            |       |       |       |        |
|          |          |        | $a = 0.5$ | $a = 0.95$ | $a = 0.5$ | $a = 0.95$ | $a = 0.5$ | $a = 0.95$ | $a = 0.5$       | $a = 0.95$ | $a = 0.5$ | $a = 0.95$ | $a = 0.5$ | $a = 0.95$ |       |       |       |        |
| 1        | 25       | 0.25   | 0.030     | 0.013      | 0.000     | 0.000      | 0.000     | 0.017      | 0.000           | 0.000      | 0.050     | 0.100      | 0.000     | 0.050      | 0.000 | 0.150 | 0.000 | 0.000  |
|          |          | 0.50   | 0.013     | 0.009      | 0.000     | 0.000      | 0.004     | 0.017      | 0.000           | 0.000      | 0.050     | 0.050      | 0.000     | 0.000      | 0.000 | 0.200 | 0.000 | 0.000  |
|          |          | 1.00   | 0.052     | 0.013      | 0.000     | 0.000      | 0.009     | 0.009      | 0.000           | 0.000      | 0.000     | 0.000      | 0.000     | 0.000      | 0.000 | 0.050 | 0.100 | 0.000  |
|          | 500      | 0.25   | 0.014     | 0.018      | 0.000     | 0.002      | 0.006     | 0.012      | 0.000           | 0.001      | 0.024     | 0.108      | 0.000     | 0.016      | 0.012 | 0.084 | 0.000 | 0.016  |
|          |          | 0.50   | 0.020     | 0.013      | 0.001     | 0.001      | 0.008     | 0.015      | 0.000           | 0.001      | 0.036     | 0.048      | 0.008     | 0.004      | 0.016 | 0.096 | 0.000 | 0.016  |
|          |          | 1.00   | 0.036     | 0.006      | 0.004     | 0.000      | 0.009     | 0.017      | 0.000           | 0.002      | 0.044     | 0.016      | 0.008     | 0.000      | 0.020 | 0.084 | 0.000 | 0.032  |
| 3        | 25       | 0.25   | 0.013     | 0.009      | 0.000     | 0.000      | 0.004     | 0.000      | 0.000           | 0.000      | 0.000     | 0.350      | 0.000     | 0.050      | 0.000 | 0.350 | 0.000 | 0.050  |
|          |          | 0.50   | 0.022     | 0.013      | 0.000     | 0.000      | 0.009     | 0.004      | 0.000           | 0.000      | 0.000     | 0.100      | 0.000     | 0.000      | 0.100 | 0.150 | 0.000 | 0.000  |
|          |          | 1.00   | 0.030     | 0.004      | 0.009     | 0.000      | 0.004     | 0.004      | 0.000           | 0.000      | 0.000     | 0.050      | 0.000     | 0.000      | 0.050 | 0.300 | 0.000 | 0.050  |
|          | 500      | 0.25   | 0.019     | 0.014      | 0.000     | 0.002      | 0.007     | 0.010      | 0.000           | 0.000      | 0.028     | 0.248      | 0.000     | 0.080      | 0.044 | 0.308 | 0.000 | 0.132  |
|          |          | 0.50   | 0.016     | 0.013      | 0.001     | 0.000      | 0.009     | 0.009      | 0.000           | 0.000      | 0.048     | 0.140      | 0.012     | 0.024      | 0.048 | 0.388 | 0.000 | 0.160  |
|          |          | 1.00   | 0.033     | 0.005      | 0.004     | 0.000      | 0.006     | 0.011      | 0.000           | 0.001      | 0.036     | 0.040      | 0.000     | 0.004      | 0.028 | 0.336 | 0.000 | 0.136  |
| 5        | 25       | 0.25   | 0.004     | 0.000      | 0.000     | 0.000      | 0.000     | 0.004      | 0.000           | 0.000      | 0.000     | 0.800      | 0.000     | 0.250      | 0.000 | 0.750 | 0.000 | 0.350  |
|          |          | 0.50   | 0.022     | 0.004      | 0.000     | 0.000      | 0.000     | 0.000      | 0.000           | 0.000      | 0.000     | 0.450      | 0.000     | 0.050      | 0.000 | 0.850 | 0.000 | 0.550  |
|          |          | 1.00   | 0.030     | 0.000      | 0.000     | 0.000      | 0.000     | 0.000      | 0.000           | 0.000      | 0.000     | 0.250      | 0.000     | 0.100      | 0.000 | 0.900 | 0.000 | 0.4000 |
|          | 500      | 0.25   | 0.003     | 0.001      | 0.000     | 0.000      | 0.001     | 0.001      | 0.000           | 0.000      | 0.000     | 0.420      | 0.000     | 0.240      | 0.000 | 0.724 | 0.000 | 0.552  |
|          |          | 0.50   | 0.009     | 0.000      | 0.000     | 0.000      | 0.002     | 0.000      | 0.000           | 0.000      | 0.000     | 0.240      | 0.000     | 0.160      | 0.000 | 0.676 | 0.000 | 0.532  |
|          |          | 1.00   | 0.028     | 0.002      | 0.005     | 0.000      | 0.001     | 0.000      | 0.000           | 0.000      | 0.000     | 0.096      | 0.000     | 0.052      | 0.000 | 0.520 | 0.000 | 0.368  |

Mean proportion of neutrally evolving and selected loci over 10 replicates identified as outliers for the *NGS-population model*.
