# Supplementary material for: A Hierarchical Bayesian Model for Next-Generation Population Genomics
Source: Oxford University Press journal article supplement (doi:10.1534/genetics.110.124693), 2011-01-07
Supplement: tables4.pdf [file tables4.pdf]

**TABLE S4**  
**Proportion of outlier loci (group structure) with the *NGS-individual model***

| $S_G$ | No. loci | $\phi$      | Neutral          |                   |                   |                    | Selective Sweep  |                   |                   |                    |
|-------|----------|-------------|------------------|-------------------|-------------------|--------------------|------------------|-------------------|-------------------|--------------------|
|       |          |             | $a = 0.5$<br>low | $a = 0.5$<br>high | $a = 0.95$<br>low | $a = 0.95$<br>high | $a = 0.5$<br>low | $a = 0.5$<br>high | $a = 0.95$<br>low | $a = 0.95$<br>high |
| 1     | 25       | $\phi_{ST}$ | 0.004            | 0.030             | 0.002             | 0.009              | 0.000            | 0.025             | 0.000             | 0.000              |
|       |          | $\phi_{CT}$ | 0.009            | 0.028             | 0.000             | 0.004              | 0.025            | 0.025             | 0.000             | 0.000              |
|       |          | $\phi_{SC}$ | 0.007            | 0.024             | 0.000             | 0.000              | 0.000            | 0.150             | 0.000             | 0.025              |
|       | 500      | $\phi_{ST}$ | 0.014            | 0.032             | 0.003             | 0.008              | 0.016            | 0.012             | 0.000             | 0.000              |
|       |          | $\phi_{CT}$ | 0.019            | 0.032             | 0.003             | 0.009              | 0.048            | 0.008             | 0.012             | 0.000              |
|       |          | $\phi_{SC}$ | 0.009            | 0.010             | 0.000             | 0.000              | 0.004            | 0.120             | 0.000             | 0.044              |
| 2     | 25       | $\phi_{ST}$ | 0.004            | 0.002             | 0.000             | 0.000              | 0.000            | 0.925             | 0.000             | 0.875              |
|       |          | $\phi_{CT}$ | 0.020            | 0.017             | 0.002             | 0.000              | 0.225            | 0.100             | 0.175             | 0.025              |
|       |          | $\phi_{SC}$ | 0.000            | 0.000             | 0.000             | 0.000              | 0.000            | 0.950             | 0.000             | 0.900              |
|       | 500      | $\phi_{ST}$ | 0.006            | 0.002             | 0.000             | 0.000              | 0.000            | 1.000             | 0.000             | 0.988              |
|       |          | $\phi_{CT}$ | 0.020            | 0.029             | 0.004             | 0.009              | 0.164            | 0.108             | 0.160             | 0.100              |
|       |          | $\phi_{SC}$ | 0.000            | 0.000             | 0.000             | 0.000              | 0.000            | 1.000             | 0.000             | 0.988              |

Mean proportion of neutrally evolving and selected loci over 10 replicates identified as outliers with group structure for the *NGS-individual model*.
