# Supplementary material for: A Hierarchical Bayesian Model for Next-Generation Population Genomics
Source: Oxford University Press journal article supplement (doi:10.1534/genetics.110.124693), 2011-01-07
Supplement: tables5.pdf [file tables5.pdf]

TABLE S5

Summary of outlier analysis for the worldwide human SNP data (JAKOBSSON *et al.* 2008). For each genetic region we give the chromosome number (Chrom.), gene ID (Gene), and classification as a low (l) or high (h)  $\phi_{ST}$  outlier as well as whether outlier status was at  $a = 0.5$  or  $a = 0.95$ . Additionally we provide the median and credible intervals for each locus's  $\phi_{ST}$  and quantile in the genome-level distribution.

| Chrom. | Gene     | Class. | Quant.<br>(lb) | Quant.<br>(median) | Quant.<br>(ub) | $\phi_{ST}$<br>(lb) | $\phi_{ST}$<br>(median) | $\phi_{ST}$<br>(ub) |
|--------|----------|--------|----------------|--------------------|----------------|---------------------|-------------------------|---------------------|
| 1      | AKT3     | l-0.5  | 0.0015         | 0.0167             | 0.1217         | -0.1017             | -0.0455                 | 0.0201              |
| 1      | C1orf116 | l-0.5  | 0.0016         | 0.0190             | 0.1253         | -0.1007             | -0.0420                 | 0.0209              |
| 1      | C1orf117 | l-0.5  | 0.0018         | 0.0137             | 0.0711         | -0.0981             | -0.0508                 | -0.0009             |
| 1      | GPR161   | l-0.5  | 0.0001         | 0.0061             | 0.1521         | -0.1631             | -0.0712                 | 0.0297              |
| 1      | GSTM4    | l-0.5  | 0.0011         | 0.0205             | 0.1673         | -0.1089             | -0.0399                 | 0.0335              |
| 1      | MYCBP    | l-0.5  | 0.0019         | 0.0146             | 0.0828         | -0.0969             | -0.0493                 | 0.0048              |
| 1      | PLA2G2D  | l-0.5  | 0.0014         | 0.0243             | 0.1920         | -0.1036             | -0.0351                 | 0.0399              |
| 1      | ACADM    | h-0.5  | 0.9536         | 0.9938             | 0.9995         | 0.2119              | 0.2655                  | 0.3168              |
| 1      | AIM1L    | h-0.5  | 0.9249         | 0.9851             | 0.9981         | 0.1960              | 0.2441                  | 0.2906              |
| 1      | AP4B1    | h-0.5  | 0.9489         | 0.9951             | 0.9997         | 0.2087              | 0.2710                  | 0.3267              |
| 1      | ASPM     | h-0.5  | 0.8376         | 0.9752             | 0.9981         | 0.1653              | 0.2304                  | 0.2903              |
| 1      | ATPAF1   | h-0.5  | 0.9639         | 0.9971             | 0.9999         | 0.2192              | 0.2824                  | 0.3420              |
| 1      | C1orf113 | h-0.5  | 0.9074         | 0.9882             | 0.9992         | 0.1883              | 0.2500                  | 0.3076              |
| 1      | C1orf114 | h-0.5  | 0.8921         | 0.9770             | 0.9973         | 0.1825              | 0.2325                  | 0.2834              |
| 1      | C1orf123 | h-0.5  | 0.9202         | 0.9903             | 0.9994         | 0.1935              | 0.2550                  | 0.3111              |
| 1      | C1orf161 | h-0.5  | 0.9433         | 0.9886             | 0.9987         | 0.2055              | 0.2510                  | 0.2984              |
| 1      | C1orf83  | h-0.5  | 0.8171         | 0.9774             | 0.9987         | 0.1603              | 0.2330                  | 0.2983              |
| 1      | C1orf83  | h-0.5  | 0.9513         | 0.9960             | 0.9998         | 0.2101              | 0.2755                  | 0.3345              |
| 1      | CD34     | h-0.5  | 0.9540         | 0.9915             | 0.9990         | 0.2125              | 0.2581                  | 0.3017              |
| 1      | ELA3B    | h-0.5  | 0.8788         | 0.9763             | 0.9973         | 0.1782              | 0.2318                  | 0.2832              |
| 1      | FCER1A   | h-0.5  | 0.9222         | 0.9829             | 0.9975         | 0.1951              | 0.2405                  | 0.2846              |
| 1      | GPR88    | h-0.5  | 0.9547         | 0.9900             | 0.9984         | 0.2127              | 0.2540                  | 0.2942              |

Continued on next page

TABLE S5 – continued from previous page

| Chrom. | Gene      | Class. | Quant.<br>(lb) | Quant.<br>(median) | Quant.<br>(ub) | $\phi_{ST}$<br>(lb) | $\phi_{ST}$<br>(median) | $\phi_{ST}$<br>(ub) |
|--------|-----------|--------|----------------|--------------------|----------------|---------------------|-------------------------|---------------------|
| 1      | HMCN1     | h-0.5  | 0.9608         | 0.9982             | 1.0000         | 0.2174              | 0.2915                  | 0.3563              |
| 1      | HNRPR     | h-0.5  | 0.9246         | 0.9884             | 0.9989         | 0.1960              | 0.2506                  | 0.3016              |
| 1      | ILF2      | h-0.5  | 0.9176         | 0.9845             | 0.9981         | 0.1926              | 0.2431                  | 0.2907              |
| 1      | INSRR     | h-0.5  | 0.8887         | 0.9753             | 0.9965         | 0.1814              | 0.2304                  | 0.2779              |
| 1      | KCNT2     | h-0.5  | 0.9559         | 0.9981             | 1.0000         | 0.2131              | 0.2912                  | 0.3615              |
| 1      | KIAA0319L | h-0.5  | 0.8693         | 0.9802             | 0.9986         | 0.1750              | 0.2366                  | 0.2958              |
| 1      | LRRC7     | h-0.5  | 0.9286         | 0.9898             | 0.9993         | 0.1978              | 0.2539                  | 0.3104              |
| 1      | MEF2D     | h-0.5  | 0.9292         | 0.9855             | 0.9982         | 0.1980              | 0.2449                  | 0.2914              |
| 1      | NBL1      | h-0.5  | 0.9640         | 0.9929             | 0.9991         | 0.2204              | 0.2627                  | 0.3031              |
| 1      | NBPF3     | h-0.5  | 0.9042         | 0.9777             | 0.9967         | 0.1870              | 0.2334                  | 0.2789              |
| 1      | ORC1L     | h-0.5  | 0.9018         | 0.9832             | 0.9985         | 0.1860              | 0.2410                  | 0.2956              |
| 1      | PHTF1     | h-0.5  | 0.9478         | 0.9909             | 0.9991         | 0.2078              | 0.2563                  | 0.3049              |
| 1      | PSMA5     | h-0.5  | 0.9569         | 0.9947             | 0.9996         | 0.2142              | 0.2688                  | 0.3209              |
| 1      | RGL1      | h-0.5  | 0.9513         | 0.9930             | 0.9995         | 0.2103              | 0.2627                  | 0.3141              |
| 1      | SNX27     | h-0.5  | 0.9244         | 0.9779             | 0.9954         | 0.1959              | 0.2337                  | 0.2721              |
| 1      | TRIM46    | h-0.5  | 0.9376         | 0.9838             | 0.9971         | 0.2023              | 0.2420                  | 0.2815              |
| 1      | TM2D1     | l-0.95 | 0.0008         | 0.0051             | 0.0273         | -0.1154             | -0.0755                 | -0.0320             |
| 1      | C1orf41   | h-0.95 | 0.9968         | 0.9998             | 1.0000         | 0.2798              | 0.3322                  | 0.3808              |
| 1      | CLCNKB    | h-0.95 | 0.9859         | 0.9988             | 0.9999         | 0.2456              | 0.2997                  | 0.3505              |
| 1      | CLSPN     | h-0.95 | 0.9975         | 0.9998             | 1.0000         | 0.2855              | 0.3343                  | 0.3793              |
| 1      | EIF2C1    | h-0.95 | 0.9999         | 1.0000             | 1.0000         | 0.3387              | 0.3881                  | 0.4335              |
| 1      | EIF2C3    | h-0.95 | 0.9961         | 0.9997             | 1.0000         | 0.2760              | 0.3237                  | 0.3695              |
| 1      | EPS15     | h-0.95 | 0.9862         | 0.9989             | 1.0000         | 0.2461              | 0.3010                  | 0.3552              |
| 1      | FRRS1     | h-0.95 | 0.9710         | 0.9957             | 0.9997         | 0.2256              | 0.2740                  | 0.3218              |
| 1      | KHDRBS1   | h-0.95 | 0.9757         | 0.9984             | 1.0000         | 0.2309              | 0.2947                  | 0.3554              |
| 1      | KIAA0319L | h-0.95 | 0.9664         | 0.9963             | 0.9998         | 0.2214              | 0.2768                  | 0.3306              |
| 1      | KIAA0907  | h-0.95 | 0.9712         | 0.9989             | 1.0000         | 0.2261              | 0.3016                  | 0.3673              |
| 1      | MASP2     | h-0.95 | 0.9899         | 0.9989             | 0.9999         | 0.2540              | 0.3015                  | 0.3473              |
| 1      | OSBPL9    | h-0.95 | 0.9796         | 0.9986             | 1.0000         | 0.2354              | 0.2974                  | 0.3520              |

Continued on next page

TABLE S5 – continued from previous page

| Chrom. | Gene     | Class. | Quant.<br>(lb) | Quant.<br>(median) | Quant.<br>(ub) | $\phi_{ST}$<br>(lb) | $\phi_{ST}$<br>(median) | $\phi_{ST}$<br>(ub) |
|--------|----------|--------|----------------|--------------------|----------------|---------------------|-------------------------|---------------------|
| 1      | PMVK     | h-0.95 | 0.9848         | 0.9998             | 1.0000         | 0.2434              | 0.3282                  | 0.4002              |
| 1      | POLR3GL  | h-0.95 | 0.9871         | 0.9997             | 1.0000         | 0.2475              | 0.3256                  | 0.3922              |
| 1      | RABGAP1L | h-0.95 | 0.9755         | 0.9974             | 0.9999         | 0.2311              | 0.2844                  | 0.3359              |
| 1      | RABGGTB  | h-0.95 | 0.9757         | 0.9961             | 0.9996         | 0.2311              | 0.2757                  | 0.3174              |
| 1      | RBBP5    | h-0.95 | 0.9943         | 0.9996             | 1.0000         | 0.2673              | 0.3194                  | 0.3679              |
| 1      | RC3H1    | h-0.95 | 0.9912         | 0.9994             | 1.0000         | 0.2571              | 0.3129                  | 0.3632              |
| 1      | SH3BP5L  | h-0.95 | 0.9982         | 0.9999             | 1.0000         | 0.2922              | 0.3371                  | 0.3799              |
| 1      | SHE      | h-0.95 | 0.9889         | 0.9990             | 0.9999         | 0.2514              | 0.3028                  | 0.3492              |
| 1      | SLC16A1  | h-0.95 | 0.9896         | 0.9993             | 1.0000         | 0.2533              | 0.3095                  | 0.3599              |
| 1      | SLC9A11  | h-0.95 | 0.9987         | 1.0000             | 1.0000         | 0.2977              | 0.3642                  | 0.4257              |
| 1      | SYF2     | h-0.95 | 0.9998         | 1.0000             | 1.0000         | 0.3325              | 0.4019                  | 0.4630              |
| 1      | UBE2J2   | h-0.95 | 0.9767         | 0.9996             | 1.0000         | 0.2321              | 0.3199                  | 0.3941              |
| 1      | YY1AP1   | h-0.95 | 0.9811         | 0.9996             | 1.0000         | 0.2375              | 0.3189                  | 0.3886              |
| 1      | ZBTB41   | h-0.95 | 0.9975         | 0.9998             | 1.0000         | 0.2856              | 0.3355                  | 0.3850              |
| 1      | ZMYM4    | h-0.95 | 0.9860         | 0.9982             | 0.9999         | 0.2458              | 0.2920                  | 0.3372              |
| 1      | ZMYM6    | h-0.95 | 0.9997         | 1.0000             | 1.0000         | 0.3267              | 0.3962                  | 0.4585              |
| 2      | EIF2AK2  | l-0.5  | 0.0010         | 0.0145             | 0.1055         | -0.0956             | -0.0384                 | 0.0216              |
| 2      | MGC39518 | l-0.5  | 0.0003         | 0.0125             | 0.1879         | -0.1204             | -0.0421                 | 0.0451              |
| 2      | SMYD5    | l-0.5  | 0.0049         | 0.0219             | 0.0819         | -0.0632             | -0.0278                 | 0.0123              |
| 2      | XPO1     | l-0.5  | 0.0003         | 0.0164             | 0.2286         | -0.1175             | -0.0352                 | 0.0541              |
| 2      | ALK      | h-0.5  | 0.8903         | 0.9772             | 0.9971         | 0.1800              | 0.2279                  | 0.2737              |
| 2      | CAB39    | h-0.5  | 0.9596         | 0.9938             | 0.9996         | 0.2123              | 0.2590                  | 0.3075              |
| 2      | CHST10   | h-0.5  | 0.8857         | 0.9832             | 0.9988         | 0.1785              | 0.2357                  | 0.2910              |
| 2      | CREG2    | h-0.5  | 0.8386         | 0.9791             | 0.9986         | 0.1645              | 0.2304                  | 0.2885              |
| 2      | CTDSP1   | h-0.5  | 0.9642         | 0.9928             | 0.9990         | 0.2160              | 0.2556                  | 0.2937              |
| 2      | FLJ20758 | h-0.5  | 0.9261         | 0.9873             | 0.9987         | 0.1937              | 0.2427                  | 0.2892              |
| 2      | KYNU     | h-0.5  | 0.9414         | 0.9933             | 0.9997         | 0.2005              | 0.2571                  | 0.3138              |
| 2      | LOC51252 | h-0.5  | 0.9550         | 0.9897             | 0.9984         | 0.2096              | 0.2476                  | 0.2849              |
| 2      | MALL     | h-0.5  | 0.9563         | 0.9971             | 0.9999         | 0.2097              | 0.2747                  | 0.3367              |

Continued on next page

TABLE S5 – continued from previous page

| Chrom. | Gene     | Class. | Quant.<br>(lb) | Quant.<br>(median) | Quant.<br>(ub) | $\phi_{ST}$<br>(lb) | $\phi_{ST}$<br>(median) | $\phi_{ST}$<br>(ub) |
|--------|----------|--------|----------------|--------------------|----------------|---------------------|-------------------------|---------------------|
| 2      | MKI67IP  | h-0.5  | 0.9526         | 0.9959             | 0.9998         | 0.2076              | 0.2674                  | 0.3228              |
| 2      | ORMDL1   | h-0.5  | 0.8793         | 0.9895             | 0.9997         | 0.1765              | 0.2470                  | 0.3128              |
| 2      | REEP1    | h-0.5  | 0.8450         | 0.9847             | 0.9994         | 0.1661              | 0.2382                  | 0.3043              |
| 2      | REEP1    | h-0.5  | 0.9332         | 0.9911             | 0.9994         | 0.1968              | 0.2507                  | 0.3046              |
| 2      | RHBDD1   | h-0.5  | 0.9498         | 0.9937             | 0.9995         | 0.2065              | 0.2583                  | 0.3075              |
| 2      | RNF149   | h-0.5  | 0.9336         | 0.9899             | 0.9989         | 0.1970              | 0.2478                  | 0.2930              |
| 2      | SELI     | h-0.5  | 0.9476         | 0.9964             | 0.9999         | 0.2044              | 0.2702                  | 0.3299              |
| 2      | STK11IP  | h-0.5  | 0.8709         | 0.9848             | 0.9991         | 0.1736              | 0.2381                  | 0.2956              |
| 2      | SULT1C2  | h-0.5  | 0.9477         | 0.9948             | 0.9997         | 0.2048              | 0.2625                  | 0.3164              |
| 2      | TMEFF2   | h-0.5  | 0.9186         | 0.9854             | 0.9981         | 0.1904              | 0.2391                  | 0.2841              |
| 2      | TRPM8    | h-0.5  | 0.8220         | 0.9842             | 0.9995         | 0.1605              | 0.2373                  | 0.3055              |
| 2      | ZNF512   | h-0.5  | 0.9559         | 0.9948             | 0.9997         | 0.2100              | 0.2627                  | 0.3143              |
| 2      | RIF1     | l-0.95 | 0.0006         | 0.0048             | 0.0267         | -0.1051             | -0.0646                 | -0.0226             |
| 2      | AOX2     | h-0.95 | 0.9840         | 0.9980             | 0.9999         | 0.2371              | 0.2823                  | 0.3275              |
| 2      | BIN1     | h-0.95 | 0.9919         | 0.9994             | 1.0000         | 0.2525              | 0.3044                  | 0.3556              |
| 2      | C2orf13  | h-0.95 | 0.9994         | 1.0000             | 1.0000         | 0.3041              | 0.3569                  | 0.4085              |
| 2      | CMKOR1   | h-0.95 | 0.9707         | 0.9967             | 0.9998         | 0.2216              | 0.2720                  | 0.3213              |
| 2      | KIAA1212 | h-0.95 | 0.9818         | 0.9990             | 1.0000         | 0.2333              | 0.2946                  | 0.3490              |
| 2      | PROKR1   | h-0.95 | 0.9948         | 0.9997             | 1.0000         | 0.2625              | 0.3165                  | 0.3658              |
| 2      | PSCDBP   | h-0.95 | 0.9968         | 0.9998             | 1.0000         | 0.2725              | 0.3220                  | 0.3735              |
| 2      | RAB3GAP1 | h-0.95 | 0.9625         | 0.9986             | 1.0000         | 0.2137              | 0.2881                  | 0.3572              |
| 2      | SMC6L1   | h-0.95 | 0.9960         | 1.0000             | 1.0000         | 0.2677              | 0.3464                  | 0.4152              |
| 2      | SMYD1    | h-0.95 | 1.0000         | 1.0000             | 1.0000         | 0.3423              | 0.3974                  | 0.4457              |
| 2      | ZRANB3   | h-0.95 | 0.9765         | 0.9992             | 1.0000         | 0.2268              | 0.2993                  | 0.3597              |
| 3      | CEP63    | l-0.5  | 0.0015         | 0.0108             | 0.0543         | -0.0848             | -0.0445                 | -0.0017             |
| 3      | GPR156   | l-0.5  | 0.0023         | 0.0122             | 0.0503         | -0.0767             | -0.0415                 | -0.0044             |
| 3      | ARL6     | h-0.5  | 0.9189         | 0.9826             | 0.9977         | 0.1864              | 0.2296                  | 0.2720              |
| 3      | B3GNT5   | h-0.5  | 0.9435         | 0.9935             | 0.9996         | 0.1977              | 0.2522                  | 0.3032              |
| 3      | BCL6     | h-0.5  | 0.9323         | 0.9882             | 0.9987         | 0.1927              | 0.2388                  | 0.2832              |

Continued on next page

TABLE S5 – continued from previous page

| Chrom. | Gene     | Class. | Quant.<br>(lb) | Quant.<br>(median) | Quant.<br>(ub) | $\phi_{ST}$<br>(lb) | $\phi_{ST}$<br>(median) | $\phi_{ST}$<br>(ub) |
|--------|----------|--------|----------------|--------------------|----------------|---------------------|-------------------------|---------------------|
| 3      | C3orf17  | h-0.5  | 0.9370         | 0.9900             | 0.9991         | 0.1943              | 0.2426                  | 0.2906              |
| 3      | C3orf25  | h-0.5  | 0.9158         | 0.9838             | 0.9983         | 0.1847              | 0.2315                  | 0.2776              |
| 3      | DNAH1    | h-0.5  | 0.9268         | 0.9860             | 0.9985         | 0.1898              | 0.2347                  | 0.2800              |
| 3      | FLJ25996 | h-0.5  | 0.9350         | 0.9882             | 0.9986         | 0.1935              | 0.2389                  | 0.2821              |
| 3      | MAPKAPK3 | h-0.5  | 0.8826         | 0.9899             | 0.9997         | 0.1736              | 0.2424                  | 0.3076              |
| 3      | NGLY1    | h-0.5  | 0.9304         | 0.9885             | 0.9990         | 0.1910              | 0.2392                  | 0.2876              |
| 3      | NR2C2    | h-0.5  | 0.9094         | 0.9770             | 0.9961         | 0.1831              | 0.2227                  | 0.2617              |
| 3      | PCAF     | h-0.5  | 0.9187         | 0.9856             | 0.9985         | 0.1866              | 0.2340                  | 0.2793              |
| 3      | PLCXD2   | h-0.5  | 0.9041         | 0.9751             | 0.9963         | 0.1803              | 0.2207                  | 0.2623              |
| 3      | PLS1     | h-0.5  | 0.9424         | 0.9894             | 0.9989         | 0.1976              | 0.2415                  | 0.2861              |
| 3      | RASA2    | h-0.5  | 0.8803         | 0.9806             | 0.9986         | 0.1725              | 0.2271                  | 0.2824              |
| 3      | RBP2     | h-0.5  | 0.8786         | 0.9843             | 0.9991         | 0.1718              | 0.2322                  | 0.2907              |
| 3      | UNQ846   | h-0.5  | 0.9097         | 0.9806             | 0.9975         | 0.1829              | 0.2271                  | 0.2704              |
| 3      | BTLA     | h-0.95 | 0.9910         | 0.9993             | 1.0000         | 0.2450              | 0.2953                  | 0.3438              |
| 3      | C3orf23  | h-0.95 | 0.9959         | 0.9997             | 1.0000         | 0.2624              | 0.3097                  | 0.3539              |
| 3      | C3orf37  | h-0.95 | 0.9697         | 0.9977             | 0.9999         | 0.2157              | 0.2733                  | 0.3248              |
| 3      | C3orf58  | h-0.95 | 0.9842         | 0.9992             | 1.0000         | 0.2326              | 0.2921                  | 0.3468              |
| 3      | COPG     | h-0.95 | 0.9941         | 0.9997             | 1.0000         | 0.2541              | 0.3098                  | 0.3629              |
| 3      | GNAI2    | h-0.95 | 0.9980         | 0.9999             | 1.0000         | 0.2761              | 0.3260                  | 0.3715              |
| 3      | GORASP1  | h-0.95 | 0.9995         | 1.0000             | 1.0000         | 0.2997              | 0.3492                  | 0.3956              |
| 3      | LMLN     | h-0.95 | 0.9778         | 0.9981             | 0.9999         | 0.2234              | 0.2769                  | 0.3268              |
| 3      | LTF      | h-0.95 | 0.9766         | 0.9978             | 0.9999         | 0.2225              | 0.2743                  | 0.3243              |
| 3      | MSL2L1   | h-0.95 | 0.9707         | 0.9983             | 1.0000         | 0.2165              | 0.2792                  | 0.3377              |
| 3      | NPCDR1   | h-0.95 | 0.9794         | 0.9985             | 0.9999         | 0.2254              | 0.2813                  | 0.3323              |
| 3      | RBP1     | h-0.95 | 0.9772         | 0.9971             | 0.9998         | 0.2232              | 0.2689                  | 0.3134              |
| 3      | TRAK1    | h-0.95 | 0.9983         | 1.0000             | 1.0000         | 0.2783              | 0.3344                  | 0.3882              |
| 4      | KLHL8    | l-0.5  | 0.0001         | 0.0080             | 0.1424         | -0.1536             | -0.0674                 | 0.0264              |
| 4      | C4orf18  | h-0.5  | 0.9279         | 0.9814             | 0.9966         | 0.2011              | 0.2425                  | 0.2824              |
| 4      | CCDC4    | h-0.5  | 0.9555         | 0.9926             | 0.9993         | 0.2178              | 0.2660                  | 0.3140              |

Continued on next page

TABLE S5 – continued from previous page

| Chrom. | Gene     | Class. | Quant.<br>(lb) | Quant.<br>(median) | Quant.<br>(ub) | $\phi_{ST}$<br>(lb) | $\phi_{ST}$<br>(median) | $\phi_{ST}$<br>(ub) |
|--------|----------|--------|----------------|--------------------|----------------|---------------------|-------------------------|---------------------|
| 4      | HCAP-G   | h-0.5  | 0.9144         | 0.9843             | 0.9984         | 0.1941              | 0.2475                  | 0.2979              |
| 4      | LEF1     | h-0.5  | 0.9273         | 0.9826             | 0.9974         | 0.2010              | 0.2444                  | 0.2878              |
| 4      | MOBKL1A  | h-0.5  | 0.9038         | 0.9853             | 0.9990         | 0.1899              | 0.2490                  | 0.3071              |
| 4      | NUDT6    | h-0.5  | 0.9562         | 0.9924             | 0.9992         | 0.2182              | 0.2652                  | 0.3109              |
| 4      | NUP54    | h-0.5  | 0.9501         | 0.9935             | 0.9996         | 0.2135              | 0.2693                  | 0.3228              |
| 4      | STX18    | h-0.5  | 0.9399         | 0.9877             | 0.9986         | 0.2078              | 0.2536                  | 0.3022              |
| 4      | TBC1D19  | h-0.5  | 0.9401         | 0.9911             | 0.9993         | 0.2076              | 0.2618                  | 0.3156              |
| 4      | TLR10    | h-0.5  | 0.8653         | 0.9763             | 0.9978         | 0.1768              | 0.2357                  | 0.2920              |
| 4      | ARHGAP10 | h-0.95 | 0.9977         | 0.9998             | 1.0000         | 0.2930              | 0.3374                  | 0.3778              |
| 4      | CENTD1   | h-0.95 | 0.9902         | 0.9984             | 0.9999         | 0.2597              | 0.3007                  | 0.3447              |
| 4      | DCK      | h-0.95 | 0.9999         | 1.0000             | 1.0000         | 0.3526              | 0.4099                  | 0.4624              |
| 4      | ENAM     | h-0.95 | 0.9993         | 1.0000             | 1.0000         | 0.3171              | 0.3827                  | 0.4396              |
| 4      | ESSPL    | h-0.95 | 0.9755         | 0.9970             | 0.9998         | 0.2361              | 0.2863                  | 0.3362              |
| 4      | ETFDH    | h-0.95 | 0.9992         | 1.0000             | 1.0000         | 0.3127              | 0.3954                  | 0.4679              |
| 4      | LRBA     | h-0.95 | 0.9765         | 0.9975             | 0.9999         | 0.2361              | 0.2906                  | 0.3455              |
| 4      | NPNT     | h-0.95 | 0.9859         | 0.9989             | 1.0000         | 0.2508              | 0.3070                  | 0.3613              |
| 4      | PHF22    | h-0.95 | 0.9985         | 0.9999             | 1.0000         | 0.3024              | 0.3501                  | 0.3943              |
| 4      | POLN     | h-0.95 | 0.9869         | 0.9984             | 0.9999         | 0.2516              | 0.3001                  | 0.3454              |
| 4      | SLC30A9  | h-0.95 | 0.9916         | 0.9991             | 1.0000         | 0.2641              | 0.3107                  | 0.3573              |
| 4      | TMEM34   | h-0.95 | 0.9989         | 1.0000             | 1.0000         | 0.3075              | 0.3612                  | 0.4108              |
| 5      | DNAJA5   | l-0.5  | 0.0010         | 0.0071             | 0.0386         | -0.0917             | -0.0542                 | -0.0132             |
| 5      | C6       | h-0.5  | 0.8581         | 0.9869             | 0.9996         | 0.1593              | 0.2280                  | 0.2928              |
| 5      | CD180    | h-0.5  | 0.8830         | 0.9792             | 0.9981         | 0.1674              | 0.2171                  | 0.2665              |
| 5      | GMCL1L   | h-0.5  | 0.9080         | 0.9871             | 0.9991         | 0.1753              | 0.2284                  | 0.2809              |
| 5      | HSPA4    | h-0.5  | 0.9065         | 0.9840             | 0.9984         | 0.1748              | 0.2236                  | 0.2694              |
| 5      | IL4      | h-0.5  | 0.9003         | 0.9792             | 0.9975         | 0.1729              | 0.2173                  | 0.2615              |
| 5      | LOC51334 | h-0.5  | 0.9439         | 0.9887             | 0.9986         | 0.1908              | 0.2315                  | 0.2708              |
| 5      | LOC90624 | h-0.5  | 0.9509         | 0.9917             | 0.9993         | 0.1951              | 0.2384                  | 0.2826              |
| 5      | MARCH6   | h-0.5  | 0.9528         | 0.9897             | 0.9985         | 0.1963              | 0.2336                  | 0.2703              |

Continued on next page

TABLE S5 – continued from previous page

| Chrom. | Gene     | Class. | Quant.<br>(lb) | Quant.<br>(median) | Quant.<br>(ub) | $\phi_{ST}$<br>(lb) | $\phi_{ST}$<br>(median) | $\phi_{ST}$<br>(ub) |
|--------|----------|--------|----------------|--------------------|----------------|---------------------|-------------------------|---------------------|
| 5      | SKP2     | h-0.5  | 0.9493         | 0.9936             | 0.9996         | 0.1934              | 0.2439                  | 0.2916              |
| 5      | SRFBP1   | h-0.5  | 0.8352         | 0.9788             | 0.9988         | 0.1541              | 0.2166                  | 0.2760              |
| 5      | GPBP1    | l-0.95 | 0.0002         | 0.0023             | 0.0206         | -0.1175             | -0.0774                 | -0.0293             |
| 5      | RBM22    | l-0.95 | 0.0000         | 0.0004             | 0.0386         | -0.1900             | -0.1092                 | -0.0118             |
| 5      | HINT1    | h-0.95 | 0.9818         | 0.9987             | 1.0000         | 0.2207              | 0.2745                  | 0.3265              |
| 5      | LOC92270 | h-0.95 | 0.9862         | 0.9994             | 1.0000         | 0.2273              | 0.2886                  | 0.3431              |
| 5      | MGC23985 | h-0.95 | 0.9958         | 0.9998             | 1.0000         | 0.2533              | 0.3026                  | 0.3497              |
| 5      | MSX2     | h-0.95 | 0.9929         | 0.9997             | 1.0000         | 0.2417              | 0.2991                  | 0.3511              |
| 5      | NSUN2    | h-0.95 | 0.9796         | 0.9961             | 0.9996         | 0.2176              | 0.2540                  | 0.2929              |
| 5      | PITX1    | h-0.95 | 0.9988         | 1.0000             | 1.0000         | 0.2753              | 0.3344                  | 0.3864              |
| 5      | ROPN1L   | h-0.95 | 0.9688         | 0.9952             | 0.9996         | 0.2080              | 0.2498                  | 0.2925              |
| 5      | SDHA     | h-0.95 | 0.9773         | 0.9974             | 0.9998         | 0.2159              | 0.2619                  | 0.3059              |
| 5      | SLC36A2  | h-0.95 | 0.9893         | 0.9996             | 1.0000         | 0.2325              | 0.2929                  | 0.3505              |
| 5      | WDR70    | h-0.95 | 0.9943         | 0.9997             | 1.0000         | 0.2455              | 0.2979                  | 0.3491              |
| 6      | FRS3     | l-0.5  | 0.0003         | 0.0041             | 0.0388         | -0.1045             | -0.0605                 | -0.0098             |
| 6      | GCM2     | l-0.5  | 0.0014         | 0.0173             | 0.1098         | -0.0787             | -0.0300                 | 0.0207              |
| 6      | KIFC1    | l-0.5  | 0.0003         | 0.0099             | 0.1468         | -0.1083             | -0.0425                 | 0.0312              |
| 6      | MYCT1    | l-0.5  | 0.0026         | 0.0239             | 0.1380         | -0.0682             | -0.0222                 | 0.0287              |
| 6      | TDRD6    | l-0.5  | 0.0004         | 0.0053             | 0.0448         | -0.1009             | -0.0555                 | -0.0063             |
| 6      | ZNF187   | l-0.5  | 0.0030         | 0.0223             | 0.1170         | -0.0654             | -0.0239                 | 0.0232              |
| 6      | C6orf146 | h-0.5  | 0.9155         | 0.9867             | 0.9989         | 0.1696              | 0.2166                  | 0.2631              |
| 6      | C6orf70  | h-0.5  | 0.8524         | 0.9768             | 0.9985         | 0.1509              | 0.2040                  | 0.2573              |
| 6      | CDC40    | h-0.5  | 0.8677         | 0.9762             | 0.9979         | 0.1548              | 0.2034                  | 0.2521              |
| 6      | CYB5R4   | h-0.5  | 0.9572         | 0.9951             | 0.9997         | 0.1886              | 0.2369                  | 0.2827              |
| 6      | FNDC1    | h-0.5  | 0.9051         | 0.9779             | 0.9969         | 0.1658              | 0.2051                  | 0.2448              |
| 6      | IHPK3    | h-0.5  | 0.8933         | 0.9791             | 0.9975         | 0.1624              | 0.2062                  | 0.2490              |
| 6      | IL20RA   | h-0.5  | 0.8823         | 0.9753             | 0.9972         | 0.1591              | 0.2024                  | 0.2471              |
| 6      | PEX6     | h-0.5  | 0.9103         | 0.9771             | 0.9958         | 0.1682              | 0.2044                  | 0.2388              |
| 6      | PGBD1    | h-0.5  | 0.8928         | 0.9843             | 0.9990         | 0.1622              | 0.2132                  | 0.2650              |

Continued on next page

TABLE S5 – continued from previous page

| Chrom. | Gene     | Class. | Quant.<br>(lb) | Quant.<br>(median) | Quant.<br>(ub) | $\phi_{ST}$<br>(lb) | $\phi_{ST}$<br>(median) | $\phi_{ST}$<br>(ub) |
|--------|----------|--------|----------------|--------------------|----------------|---------------------|-------------------------|---------------------|
| 6      | POPDC3   | h-0.5  | 0.9417         | 0.9948             | 0.9998         | 0.1799              | 0.2359                  | 0.2923              |
| 6      | SRPK1    | h-0.5  | 0.8672         | 0.9891             | 0.9997         | 0.1547              | 0.2210                  | 0.2831              |
| 6      | TAGAP    | h-0.5  | 0.9185         | 0.9893             | 0.9993         | 0.1706              | 0.2214                  | 0.2709              |
| 6      | UBD      | h-0.5  | 0.9104         | 0.9962             | 0.9999         | 0.1672              | 0.2418                  | 0.3070              |
| 6      | VIP      | h-0.5  | 0.9282         | 0.9951             | 0.9999         | 0.1743              | 0.2367                  | 0.2935              |
| 6      | ZNF435   | h-0.5  | 0.9373         | 0.9855             | 0.9978         | 0.1788              | 0.2147                  | 0.2508              |
| 6      | C6orf125 | h-0.95 | 0.9783         | 0.9984             | 0.9999         | 0.2060              | 0.2567                  | 0.3038              |
| 6      | C6orf167 | h-0.95 | 0.9725         | 0.9968             | 0.9998         | 0.2003              | 0.2447                  | 0.2880              |
| 6      | C6orf206 | h-0.95 | 0.9992         | 1.0000             | 1.0000         | 0.2669              | 0.3475                  | 0.4119              |
| 6      | GSTA5    | h-0.95 | 0.9781         | 0.9986             | 1.0000         | 0.2057              | 0.2587                  | 0.3096              |
| 6      | KIAA0408 | h-0.95 | 0.9932         | 0.9998             | 1.0000         | 0.2305              | 0.2864                  | 0.3374              |
| 6      | PAK1IP1  | h-0.95 | 0.9994         | 1.0000             | 1.0000         | 0.2722              | 0.3395                  | 0.3991              |
| 6      | SNRPC    | h-0.95 | 0.9881         | 0.9994             | 1.0000         | 0.2194              | 0.2732                  | 0.3227              |
| 6      | VNN3     | h-0.95 | 0.9711         | 0.9976             | 0.9999         | 0.1988              | 0.2501                  | 0.2996              |
| 7      | IGF2BP3  | l-0.5  | 0.0001         | 0.0043             | 0.0569         | -0.1411             | -0.0728                 | -0.0046             |
| 7      | PIP      | l-0.5  | 0.0012         | 0.0186             | 0.1446         | -0.0982             | -0.0374                 | 0.0290              |
| 7      | C7orf34  | h-0.5  | 0.8282         | 0.9763             | 0.9989         | 0.1589              | 0.2243                  | 0.2905              |
| 7      | CREB3L2  | h-0.5  | 0.9083         | 0.9757             | 0.9961         | 0.1840              | 0.2240                  | 0.2661              |
| 7      | EPHB6    | h-0.5  | 0.9386         | 0.9912             | 0.9994         | 0.1967              | 0.2488                  | 0.3030              |
| 7      | FAM3C    | h-0.5  | 0.9403         | 0.9912             | 0.9993         | 0.1978              | 0.2488                  | 0.2993              |
| 7      | MDH2     | h-0.5  | 0.9449         | 0.9929             | 0.9995         | 0.2003              | 0.2537                  | 0.3039              |
| 7      | PBEF1    | h-0.5  | 0.9085         | 0.9791             | 0.9969         | 0.1837              | 0.2276                  | 0.2701              |
| 7      | PSCD3    | h-0.5  | 0.8635         | 0.9754             | 0.9976         | 0.1680              | 0.2233                  | 0.2764              |
| 7      | NYD-SP18 | h-0.5  | 0.8941         | 0.9879             | 0.9994         | 0.1778              | 0.2413                  | 0.3028              |
| 7      | RPA3     | h-0.5  | 0.9227         | 0.9784             | 0.9956         | 0.1896              | 0.2269                  | 0.2628              |
| 7      | SP4      | h-0.5  | 0.9258         | 0.9846             | 0.9982         | 0.1911              | 0.2354                  | 0.2805              |
| 7      | TRIM24   | h-0.5  | 0.9181         | 0.9852             | 0.9985         | 0.1871              | 0.2364                  | 0.2843              |
| 7      | CYP3A43  | h-0.95 | 0.9678         | 0.9963             | 0.9998         | 0.2160              | 0.2674                  | 0.3187              |
| 7      | CYP3A4   | h-0.95 | 0.9896         | 0.9990             | 0.9999         | 0.2453              | 0.2928                  | 0.3384              |

Continued on next page



TABLE S5 – continued from previous page

| Chrom. | Gene     | Class. | Quant.<br>(lb) | Quant.<br>(median) | Quant.<br>(ub) | $\phi_{ST}$<br>(lb) | $\phi_{ST}$<br>(median) | $\phi_{ST}$<br>(ub) |
|--------|----------|--------|----------------|--------------------|----------------|---------------------|-------------------------|---------------------|
| 7      | CYP3A5   | h-0.95 | 0.9997         | 1.0000             | 1.0000         | 0.3147              | 0.3589                  | 0.4011              |
| 7      | DDX56    | h-0.95 | 0.9896         | 0.9996             | 1.0000         | 0.2449              | 0.3094                  | 0.3660              |
| 7      | FLJ10324 | h-0.95 | 0.9736         | 0.9969             | 0.9998         | 0.2214              | 0.2714                  | 0.3188              |
| 7      | FLJ12571 | h-0.95 | 0.9949         | 0.9997             | 1.0000         | 0.2615              | 0.3126                  | 0.3597              |
| 7      | ING3     | h-0.95 | 0.9839         | 0.9980             | 0.9999         | 0.2349              | 0.2804                  | 0.3245              |
| 7      | KCND2    | h-0.95 | 0.9762         | 0.9966             | 0.9998         | 0.2249              | 0.2692                  | 0.3172              |
| 7      | MYH16    | h-0.95 | 0.9936         | 0.9997             | 1.0000         | 0.2565              | 0.3131                  | 0.3663              |
| 7      | SMURF1   | h-0.95 | 0.9961         | 0.9997             | 1.0000         | 0.2674              | 0.3123                  | 0.3575              |
| 7      | SVH      | h-0.95 | 0.9999         | 1.0000             | 1.0000         | 0.3252              | 0.4036                  | 0.4681              |
| 7      | TRIAD3   | h-0.95 | 0.9990         | 1.0000             | 1.0000         | 0.2925              | 0.3765                  | 0.4434              |
| 7      | TRIM4    | h-0.95 | 0.9893         | 0.9995             | 1.0000         | 0.2441              | 0.3060                  | 0.3639              |
| 7      | ZFP95    | h-0.95 | 0.9999         | 1.0000             | 1.0000         | 0.3291              | 0.3757                  | 0.4177              |
| 8      | EXTL3    | l-0.5  | 0.0017         | 0.0111             | 0.0564         | -0.0708             | -0.0363                 | 0.0030              |
| 8      | ZHX1     | l-0.5  | 0.0000         | 0.0037             | 0.1125         | -0.1293             | -0.0582                 | 0.0243              |
| 8      | ADCK5    | h-0.5  | 0.8071         | 0.9781             | 0.9991         | 0.1410              | 0.2044                  | 0.2643              |
| 8      | ASH2L    | h-0.5  | 0.8827         | 0.9764             | 0.9972         | 0.1596              | 0.2027                  | 0.2447              |
| 8      | C8orf72  | h-0.5  | 0.8684         | 0.9757             | 0.9982         | 0.1553              | 0.2021                  | 0.2531              |
| 8      | CHRNA6   | h-0.5  | 0.8063         | 0.9830             | 0.9995         | 0.1409              | 0.2101                  | 0.2734              |
| 8      | CNOT7    | h-0.5  | 0.8986         | 0.9773             | 0.9968         | 0.1640              | 0.2036                  | 0.2418              |
| 8      | FLJ23356 | h-0.5  | 0.8522         | 0.9829             | 0.9991         | 0.1508              | 0.2100                  | 0.2644              |
| 8      | KIAA0196 | h-0.5  | 0.8861         | 0.9781             | 0.9975         | 0.1599              | 0.2044                  | 0.2474              |
| 8      | KIAA1967 | h-0.5  | 0.9152         | 0.9847             | 0.9986         | 0.1693              | 0.2124                  | 0.2558              |
| 8      | LRP12    | h-0.5  | 0.8505         | 0.9780             | 0.9986         | 0.1508              | 0.2044                  | 0.2569              |
| 8      | POTE8    | h-0.5  | 0.8039         | 0.9887             | 0.9998         | 0.1404              | 0.2188                  | 0.2901              |
| 8      | SAMD12   | h-0.5  | 0.9250         | 0.9859             | 0.9984         | 0.1738              | 0.2142                  | 0.2533              |
| 8      | SDCBP    | h-0.5  | 0.8948         | 0.9832             | 0.9986         | 0.1628              | 0.2105                  | 0.2566              |
| 8      | SLA      | h-0.5  | 0.9488         | 0.9922             | 0.9994         | 0.1847              | 0.2264                  | 0.2685              |
| 8      | SLC30A8  | h-0.5  | 0.8587         | 0.9754             | 0.9979         | 0.1530              | 0.2019                  | 0.2495              |
| 8      | TEX15    | h-0.5  | 0.9448         | 0.9947             | 0.9998         | 0.1815              | 0.2340                  | 0.2851              |

Continued on next page

TABLE S5 – continued from previous page

| Chrom. | Gene     | Class. | Quant.<br>(lb) | Quant.<br>(median) | Quant.<br>(ub) | $\phi_{ST}$<br>(lb) | $\phi_{ST}$<br>(median) | $\phi_{ST}$<br>(ub) |
|--------|----------|--------|----------------|--------------------|----------------|---------------------|-------------------------|---------------------|
| 8      | TSPYL5   | h-0.5  | 0.9590         | 0.9968             | 0.9999         | 0.1892              | 0.2428                  | 0.2921              |
| 8      | UBXD6    | h-0.5  | 0.9613         | 0.9926             | 0.9991         | 0.1916              | 0.2274                  | 0.2617              |
| 8      | ZNF34    | h-0.5  | 0.9154         | 0.9893             | 0.9994         | 0.1692              | 0.2201                  | 0.2701              |
| 8      | C8orf77  | h-0.95 | 0.9849         | 0.9988             | 1.0000         | 0.2131              | 0.2595                  | 0.3041              |
| 8      | CRISPLD1 | h-0.95 | 0.9872         | 0.9989             | 1.0000         | 0.2174              | 0.2610                  | 0.3049              |
| 8      | IKBKB    | h-0.95 | 0.9750         | 0.9982             | 1.0000         | 0.2016              | 0.2532                  | 0.3034              |
| 8      | TCEA1    | h-0.95 | 0.9806         | 0.9987             | 1.0000         | 0.2077              | 0.2587                  | 0.3090              |
| 8      | TMEM64   | h-0.95 | 0.9744         | 0.9986             | 1.0000         | 0.2008              | 0.2575                  | 0.3133              |
| 8      | ZNF395   | h-0.95 | 0.9868         | 0.9995             | 1.0000         | 0.2152              | 0.2740                  | 0.3292              |
| 9      | C9orf152 | l-0.5  | 0.0009         | 0.0089             | 0.0591         | -0.0869             | -0.0446                 | 0.0029              |
| 9      | PMPCA    | l-0.5  | 0.0009         | 0.0204             | 0.1845         | -0.0880             | -0.0255                 | 0.0422              |
| 9      | C5       | h-0.5  | 0.9506         | 0.9921             | 0.9993         | 0.1909              | 0.2349                  | 0.2771              |
| 9      | CDC14B   | h-0.5  | 0.8811         | 0.9847             | 0.9992         | 0.1639              | 0.2203                  | 0.2762              |
| 9      | CDKN2A   | h-0.5  | 0.9539         | 0.9925             | 0.9994         | 0.1933              | 0.2355                  | 0.2798              |
| 9      | CTSL2    | h-0.5  | 0.9390         | 0.9887             | 0.9987         | 0.1855              | 0.2271                  | 0.2674              |
| 9      | DAB2IP   | h-0.5  | 0.9607         | 0.9987             | 1.0000         | 0.1964              | 0.2680                  | 0.3335              |
| 9      | DBC1     | h-0.5  | 0.9401         | 0.9892             | 0.9989         | 0.1860              | 0.2279                  | 0.2691              |
| 9      | GARNL3   | h-0.5  | 0.8711         | 0.9861             | 0.9995         | 0.1609              | 0.2225                  | 0.2838              |
| 9      | IARS     | h-0.5  | 0.9418         | 0.9869             | 0.9980         | 0.1871              | 0.2237                  | 0.2596              |
| 9      | KIAA1539 | h-0.5  | 0.9371         | 0.9869             | 0.9985         | 0.1844              | 0.2235                  | 0.2645              |
| 9      | LAMC3    | h-0.5  | 0.9604         | 0.9935             | 0.9993         | 0.1979              | 0.2381                  | 0.2778              |
| 9      | NDUFA8   | h-0.5  | 0.9580         | 0.9927             | 0.9992         | 0.1959              | 0.2358                  | 0.2757              |
| 9      | NPR2     | h-0.5  | 0.9598         | 0.9960             | 0.9998         | 0.1968              | 0.2479                  | 0.2943              |
| 9      | NR6A1    | h-0.5  | 0.8937         | 0.9890             | 0.9995         | 0.1670              | 0.2275                  | 0.2846              |
| 9      | C9orf114 | h-0.95 | 0.9843         | 0.9979             | 0.9998         | 0.2203              | 0.2594                  | 0.2969              |
| 9      | C9orf89  | h-0.95 | 0.9873         | 0.9987             | 0.9999         | 0.2247              | 0.2679                  | 0.3117              |
| 9      | FLJ16636 | h-0.95 | 0.9999         | 1.0000             | 1.0000         | 0.3092              | 0.4013                  | 0.4717              |
| 9      | PRG-3    | h-0.95 | 0.9976         | 1.0000             | 1.0000         | 0.2567              | 0.3238                  | 0.3828              |
| 9      | RABGAP1  | h-0.95 | 0.9970         | 1.0000             | 1.0000         | 0.2525              | 0.3159                  | 0.3742              |

Continued on next page

TABLE S5 – continued from previous page

| Chrom. | Gene     | Class. | Quant.<br>(lb) | Quant.<br>(median) | Quant.<br>(ub) | $\phi_{ST}$<br>(lb) | $\phi_{ST}$<br>(median) | $\phi_{ST}$<br>(ub) |
|--------|----------|--------|----------------|--------------------|----------------|---------------------|-------------------------|---------------------|
| 9      | STRBP    | h-0.95 | 0.9809         | 0.9984             | 0.9999         | 0.2151              | 0.2649                  | 0.3138              |
| 9      | TBC1D13  | h-0.95 | 0.9953         | 0.9995             | 1.0000         | 0.2463              | 0.2850                  | 0.3239              |
| 9      | TRPM6    | h-0.95 | 0.9984         | 1.0000             | 1.0000         | 0.2647              | 0.3209                  | 0.3727              |
| 9      | ZBTB26   | h-0.95 | 0.9937         | 0.9998             | 1.0000         | 0.2394              | 0.2991                  | 0.3526              |
| 10     | IFIT2    | l-0.5  | 0.0002         | 0.0085             | 0.1270         | -0.1137             | -0.0483                 | 0.0254              |
| 10     | ANKRD2   | h-0.5  | 0.8747         | 0.9838             | 0.9991         | 0.1592              | 0.2166                  | 0.2709              |
| 10     | CDNF     | h-0.5  | 0.9584         | 0.9935             | 0.9994         | 0.1939              | 0.2360                  | 0.2780              |
| 10     | BMPR1A   | h-0.5  | 0.8985         | 0.9796             | 0.9975         | 0.1673              | 0.2110                  | 0.2530              |
| 10     | C10orf70 | h-0.5  | 0.9145         | 0.9863             | 0.9989         | 0.1722              | 0.2202                  | 0.2691              |
| 10     | C10orf99 | h-0.5  | 0.8952         | 0.9784             | 0.9974         | 0.1658              | 0.2098                  | 0.2530              |
| 10     | CHUK     | h-0.5  | 0.8947         | 0.9844             | 0.9990         | 0.1653              | 0.2173                  | 0.2697              |
| 10     | GDF2     | h-0.5  | 0.8063         | 0.9813             | 0.9993         | 0.1428              | 0.2133                  | 0.2757              |
| 10     | HECTD2   | h-0.5  | 0.9484         | 0.9957             | 0.9999         | 0.1872              | 0.2441                  | 0.2992              |
| 10     | ITGB1    | h-0.5  | 0.8937         | 0.9778             | 0.9976         | 0.1650              | 0.2092                  | 0.2540              |
| 10     | KIAA1754 | h-0.5  | 0.8782         | 0.9786             | 0.9982         | 0.1605              | 0.2098                  | 0.2602              |
| 10     | PPP3CB   | h-0.5  | 0.9238         | 0.9923             | 0.9997         | 0.1754              | 0.2327                  | 0.2890              |
| 10     | REEP3    | h-0.5  | 0.9600         | 0.9956             | 0.9998         | 0.1944              | 0.2437                  | 0.2926              |
| 10     | SEPHS1   | h-0.5  | 0.8384         | 0.9810             | 0.9992         | 0.1499              | 0.2126                  | 0.2729              |
| 10     | TTC18    | h-0.5  | 0.8960         | 0.9774             | 0.9972         | 0.1660              | 0.2085                  | 0.2511              |
| 10     | ECHDC3   | l-0.95 | 0.0000         | 0.0009             | 0.0123         | -0.1395             | -0.0916                 | -0.0406             |
| 10     | USP54    | l-0.95 | 0.0000         | 0.0003             | 0.0486         | -0.1953             | -0.1090                 | -0.0052             |
| 10     | ADD3     | h-0.95 | 0.9648         | 0.9979             | 1.0000         | 0.1972              | 0.2573                  | 0.3121              |
| 10     | CTNNA3   | h-0.95 | 0.9988         | 0.9999             | 1.0000         | 0.2673              | 0.3114                  | 0.3530              |
| 10     | ECHS1    | h-0.95 | 0.9660         | 0.9975             | 0.9999         | 0.1983              | 0.2546                  | 0.3083              |
| 10     | IPMK     | h-0.95 | 0.9927         | 0.9997             | 1.0000         | 0.2339              | 0.2876                  | 0.3400              |
| 10     | OIT3     | h-0.95 | 0.9966         | 0.9998             | 1.0000         | 0.2490              | 0.2946                  | 0.3391              |
| 10     | POLR3A   | h-0.95 | 0.9976         | 1.0000             | 1.0000         | 0.2552              | 0.3211                  | 0.3815              |
| 11     | PRDX5    | l-0.5  | 0.0002         | 0.0230             | 0.3628         | -0.1124             | -0.0215                 | 0.0759              |
| 11     | BAD      | h-0.5  | 0.8636         | 0.9865             | 0.9994         | 0.1606              | 0.2250                  | 0.2827              |

Continued on next page

TABLE S5 – continued from previous page

| Chrom. | Gene          | Class. | Quant.<br>(lb) | Quant.<br>(median) | Quant.<br>(ub) | $\phi_{ST}$<br>(lb) | $\phi_{ST}$<br>(median) | $\phi_{ST}$<br>(ub) |
|--------|---------------|--------|----------------|--------------------|----------------|---------------------|-------------------------|---------------------|
| 11     | C11orf49      | h-0.5  | 0.8937         | 0.9779             | 0.9977         | 0.1696              | 0.2135                  | 0.2592              |
| 11     | C11orf56      | h-0.5  | 0.9421         | 0.9864             | 0.9983         | 0.1886              | 0.2250                  | 0.2633              |
| 11     | CCS           | h-0.5  | 0.9536         | 0.9896             | 0.9983         | 0.1950              | 0.2306                  | 0.2647              |
| 11     | CKAP5         | h-0.5  | 0.9338         | 0.9890             | 0.9990         | 0.1845              | 0.2295                  | 0.2747              |
| 11     | FADS3         | h-0.5  | 0.9348         | 0.9859             | 0.9980         | 0.1854              | 0.2241                  | 0.2624              |
| 11     | FLJ12529      | h-0.5  | 0.8833         | 0.9794             | 0.9981         | 0.1662              | 0.2152                  | 0.2637              |
| 11     | GTF2H1        | h-0.5  | 0.9245         | 0.9887             | 0.9991         | 0.1803              | 0.2288                  | 0.2756              |
| 11     | MGC34821      | h-0.5  | 0.8774         | 0.9786             | 0.9981         | 0.1645              | 0.2144                  | 0.2633              |
| 11     | NRXN2         | h-0.5  | 0.9228         | 0.9851             | 0.9983         | 0.1798              | 0.2228                  | 0.2661              |
| 11     | SART1         | h-0.5  | 0.8403         | 0.9882             | 0.9996         | 0.1548              | 0.2278                  | 0.2900              |
| 11     | SDHD          | h-0.5  | 0.9500         | 0.9981             | 1.0000         | 0.1924              | 0.2637                  | 0.3260              |
| 11     | SF1           | h-0.5  | 0.9482         | 0.9906             | 0.9990         | 0.1919              | 0.2328                  | 0.2729              |
| 11     | SF3B2         | h-0.5  | 0.9418         | 0.9911             | 0.9993         | 0.1883              | 0.2342                  | 0.2795              |
| 11     | SIAE          | h-0.5  | 0.9499         | 0.9943             | 0.9997         | 0.1929              | 0.2433                  | 0.2934              |
| 11     | SLC43A1       | h-0.5  | 0.9208         | 0.9863             | 0.9988         | 0.1792              | 0.2247                  | 0.2705              |
| 11     | SYT7          | h-0.5  | 0.9650         | 0.9946             | 0.9996         | 0.2019              | 0.2443                  | 0.2873              |
| 11     | DDB1          | h-0.95 | 1.0000         | 1.0000             | 1.0000         | 0.3472              | 0.4089                  | 0.4610              |
| 11     | DKFZP564J0863 | h-0.95 | 0.9754         | 0.9993             | 1.0000         | 0.2105              | 0.2809                  | 0.3416              |
| 11     | FADS1         | h-0.95 | 0.9958         | 0.9995             | 1.0000         | 0.2500              | 0.2868                  | 0.3201              |
| 11     | FBXL11        | h-0.95 | 0.9935         | 0.9998             | 1.0000         | 0.2406              | 0.2968                  | 0.3522              |
| 11     | FLJ20294      | h-0.95 | 0.9689         | 0.9976             | 0.9999         | 0.2052              | 0.2592                  | 0.3103              |
| 11     | HRASLS5       | h-0.95 | 0.9878         | 0.9995             | 1.0000         | 0.2271              | 0.2846                  | 0.3406              |
| 11     | MGC2574       | h-0.95 | 0.9694         | 0.9965             | 0.9998         | 0.2061              | 0.2527                  | 0.2988              |
| 12     | CCDC65        | l-0.5  | 0.0062         | 0.0243             | 0.0830         | -0.0681             | -0.0341                 | 0.0044              |
| 12     | RAB5B         | l-0.5  | 0.0022         | 0.0206             | 0.1205         | -0.0915             | -0.0387                 | 0.0195              |
| 12     | BAZ2A         | h-0.5  | 0.9248         | 0.9887             | 0.9992         | 0.1925              | 0.2472                  | 0.3020              |
| 12     | C12orf44      | h-0.5  | 0.9647         | 0.9947             | 0.9995         | 0.2167              | 0.2644                  | 0.3092              |
| 12     | C12orf51      | h-0.5  | 0.9439         | 0.9917             | 0.9993         | 0.2025              | 0.2545                  | 0.3048              |
| 12     | CUTL2         | h-0.5  | 0.9607         | 0.9944             | 0.9996         | 0.2139              | 0.2633                  | 0.3122              |

Continued on next page

TABLE S5 – continued from previous page

| Chrom. | Gene      | Class. | Quant.<br>(lb) | Quant.<br>(median) | Quant.<br>(ub) | $\phi_{ST}$<br>(lb) | $\phi_{ST}$<br>(median) | $\phi_{ST}$<br>(ub) |
|--------|-----------|--------|----------------|--------------------|----------------|---------------------|-------------------------|---------------------|
| 12     | DPY19L2   | h-0.5  | 0.8293         | 0.9834             | 0.9994         | 0.1603              | 0.2373                  | 0.3063              |
| 12     | EP400NL   | h-0.5  | 0.9365         | 0.9867             | 0.9984         | 0.1984              | 0.2430                  | 0.2880              |
| 12     | EPS8      | h-0.5  | 0.9156         | 0.9898             | 0.9993         | 0.1883              | 0.2495                  | 0.3068              |
| 12     | IFT81     | h-0.5  | 0.9400         | 0.9850             | 0.9975         | 0.2006              | 0.2399                  | 0.2790              |
| 12     | KERA      | h-0.5  | 0.9284         | 0.9831             | 0.9973         | 0.1948              | 0.2368                  | 0.2782              |
| 12     | KIAA0789  | h-0.5  | 0.9388         | 0.9844             | 0.9974         | 0.1999              | 0.2389                  | 0.2787              |
| 12     | LOC196463 | h-0.5  | 0.8520         | 0.9869             | 0.9995         | 0.1665              | 0.2433                  | 0.3109              |
| 12     | LYZ       | h-0.5  | 0.8838         | 0.9856             | 0.9993         | 0.1761              | 0.2410                  | 0.3033              |
| 12     | MBD6      | h-0.5  | 0.8855         | 0.9814             | 0.9986         | 0.1773              | 0.2343                  | 0.2910              |
| 12     | NAP1L1    | h-0.5  | 0.9429         | 0.9892             | 0.9989         | 0.2018              | 0.2483                  | 0.2944              |
| 12     | NOL1      | h-0.5  | 0.9249         | 0.9929             | 0.9997         | 0.1923              | 0.2578                  | 0.3162              |
| 12     | NR4A1     | h-0.5  | 0.9583         | 0.9956             | 0.9997         | 0.2116              | 0.2686                  | 0.3207              |
| 12     | OACT5     | h-0.5  | 0.9479         | 0.9928             | 0.9994         | 0.2048              | 0.2578                  | 0.3082              |
| 12     | SLC15A4   | h-0.5  | 0.9033         | 0.9789             | 0.9973         | 0.1834              | 0.2310                  | 0.2790              |
| 12     | SLCO1C1   | h-0.5  | 0.9353         | 0.9838             | 0.9972         | 0.1984              | 0.2378                  | 0.2772              |
| 12     | SMARCC2   | h-0.5  | 0.8367         | 0.9758             | 0.9985         | 0.1627              | 0.2273                  | 0.2900              |
| 12     | UBE2N     | h-0.5  | 0.9420         | 0.9906             | 0.9992         | 0.2014              | 0.2513                  | 0.3010              |
| 12     | ULK1      | h-0.5  | 0.9188         | 0.9853             | 0.9984         | 0.1901              | 0.2405                  | 0.2883              |
| 12     | ACTR6     | h-0.95 | 0.9832         | 0.9981             | 0.9999         | 0.2378              | 0.2858                  | 0.3319              |
| 12     | ANAPC5    | h-0.95 | 0.9906         | 0.9994             | 1.0000         | 0.2514              | 0.3080                  | 0.3631              |
| 12     | AQP6      | h-0.95 | 0.9872         | 0.9983             | 0.9999         | 0.2447              | 0.2882                  | 0.3300              |
| 12     | C12orf30  | h-0.95 | 0.9764         | 0.9966             | 0.9997         | 0.2285              | 0.2743                  | 0.3197              |
| 12     | CART1     | h-0.95 | 0.9881         | 0.9986             | 0.9999         | 0.2464              | 0.2916                  | 0.3334              |
| 12     | CEP290    | h-0.95 | 0.9750         | 0.9969             | 0.9998         | 0.2269              | 0.2763                  | 0.3260              |
| 12     | CMAS      | h-0.95 | 0.9786         | 0.9976             | 0.9999         | 0.2304              | 0.2813                  | 0.3307              |
| 12     | EIF4B     | h-0.95 | 0.9993         | 1.0000             | 1.0000         | 0.3036              | 0.3599                  | 0.4132              |
| 12     | GABARAPL1 | h-0.95 | 0.9846         | 0.9983             | 0.9999         | 0.2399              | 0.2879                  | 0.3336              |
| 12     | MPHOSPH9  | h-0.95 | 0.9687         | 0.9962             | 0.9997         | 0.2200              | 0.2720                  | 0.3211              |
| 12     | PAWR      | h-0.95 | 0.9962         | 0.9999             | 1.0000         | 0.2718              | 0.3351                  | 0.3930              |

Continued on next page

TABLE S5 – continued from previous page

| Chrom. | Gene      | Class. | Quant.<br>(lb) | Quant.<br>(median) | Quant.<br>(ub) | $\phi_{ST}$<br>(lb) | $\phi_{ST}$<br>(median) | $\phi_{ST}$<br>(ub) |
|--------|-----------|--------|----------------|--------------------|----------------|---------------------|-------------------------|---------------------|
| 12     | SPATS2    | h-0.95 | 0.9999         | 1.0000             | 1.0000         | 0.3465              | 0.3944                  | 0.4380              |
| 12     | STRAP     | h-0.95 | 0.9966         | 0.9999             | 1.0000         | 0.2746              | 0.3368                  | 0.3933              |
| 12     | WDR66     | h-0.95 | 0.9826         | 0.9985             | 0.9999         | 0.2362              | 0.2901                  | 0.3448              |
| 13     | WBP4      | l-0.5  | 0.0008         | 0.0147             | 0.1256         | -0.1006             | -0.0426                 | 0.0212              |
| 13     | RB1       | h-0.5  | 0.9494         | 0.9963             | 0.9999         | 0.1894              | 0.2510                  | 0.3053              |
| 13     | C13orf12  | h-0.95 | 0.9902         | 0.9991             | 1.0000         | 0.2324              | 0.2771                  | 0.3200              |
| 13     | FAM48A    | h-0.95 | 0.9972         | 1.0000             | 1.0000         | 0.2557              | 0.3291                  | 0.3980              |
| 13     | FBXL3     | h-0.95 | 0.9992         | 1.0000             | 1.0000         | 0.2792              | 0.3340                  | 0.3856              |
| 13     | GTF2F2    | h-0.95 | 0.9942         | 0.9996             | 1.0000         | 0.2444              | 0.2911                  | 0.3377              |
| 13     | KLF5      | h-0.95 | 0.9993         | 1.0000             | 1.0000         | 0.2817              | 0.3346                  | 0.3838              |
| 13     | NDFIP2    | h-0.95 | 0.9984         | 1.0000             | 1.0000         | 0.2685              | 0.3216                  | 0.3695              |
| 13     | TGDS      | h-0.95 | 0.9835         | 0.9983             | 0.9999         | 0.2202              | 0.2661                  | 0.3100              |
| 14     | C14orf165 | l-0.5  | 0.0001         | 0.0066             | 0.1247         | -0.1503             | -0.0683                 | 0.0226              |
| 14     | FOS       | l-0.5  | 0.0012         | 0.0187             | 0.1340         | -0.1041             | -0.0414                 | 0.0246              |
| 14     | C14orf174 | h-0.5  | 0.9462         | 0.9882             | 0.9984         | 0.2094              | 0.2514                  | 0.2926              |
| 14     | DLK1      | h-0.5  | 0.9429         | 0.9921             | 0.9994         | 0.2068              | 0.2611                  | 0.3118              |
| 14     | DLST      | h-0.5  | 0.9431         | 0.9890             | 0.9986         | 0.2075              | 0.2531                  | 0.2954              |
| 14     | GPHN      | h-0.5  | 0.9125         | 0.9801             | 0.9974         | 0.1924              | 0.2376                  | 0.2848              |
| 14     | KIAA0423  | h-0.5  | 0.8789         | 0.9807             | 0.9985         | 0.1792              | 0.2385                  | 0.2965              |
| 14     | PSEN1     | h-0.5  | 0.8692         | 0.9765             | 0.9980         | 0.1762              | 0.2332                  | 0.2901              |
| 14     | RAB2B     | h-0.5  | 0.9103         | 0.9801             | 0.9974         | 0.1917              | 0.2376                  | 0.2840              |
| 14     | SEC10L1   | h-0.5  | 0.9293         | 0.9856             | 0.9983         | 0.1999              | 0.2461                  | 0.2923              |
| 14     | BRF1      | h-0.95 | 0.9960         | 0.9996             | 1.0000         | 0.2777              | 0.3227                  | 0.3675              |
| 14     | EFS       | h-0.95 | 0.9841         | 0.9975             | 0.9997         | 0.2458              | 0.2863                  | 0.3260              |
| 14     | IL17E     | h-0.95 | 0.9890         | 0.9985             | 0.9999         | 0.2549              | 0.2970                  | 0.3367              |
| 14     | JPH4      | h-0.95 | 0.9972         | 0.9999             | 1.0000         | 0.2839              | 0.3437                  | 0.3976              |
| 14     | MTA1      | h-0.95 | 0.9992         | 1.0000             | 1.0000         | 0.3105              | 0.3607                  | 0.4061              |
| 14     | RBM23     | h-0.95 | 0.9993         | 0.9999             | 1.0000         | 0.3142              | 0.3511                  | 0.3843              |
| 14     | SIX4      | h-0.95 | 0.9705         | 0.9989             | 1.0000         | 0.2264              | 0.3029                  | 0.3691              |

Continued on next page

TABLE S5 – continued from previous page

| Chrom. | Gene     | Class. | Quant.<br>(lb) | Quant.<br>(median) | Quant.<br>(ub) | $\phi_{ST}$<br>(lb) | $\phi_{ST}$<br>(median) | $\phi_{ST}$<br>(ub) |
|--------|----------|--------|----------------|--------------------|----------------|---------------------|-------------------------|---------------------|
| 14     | TDP1     | h-0.95 | 0.9675         | 0.9959             | 0.9998         | 0.2245              | 0.2759                  | 0.3272              |
| 15     | DYX1C1   | h-0.5  | 0.9427         | 0.9866             | 0.9978         | 0.2258              | 0.2705                  | 0.3146              |
| 15     | FURIN    | h-0.5  | 0.9098         | 0.9795             | 0.9971         | 0.2090              | 0.2584                  | 0.3074              |
| 15     | HERC2    | h-0.5  | 0.9329         | 0.9915             | 0.9994         | 0.2197              | 0.2828                  | 0.3389              |
| 15     | ARPP-19  | h-0.5  | 0.9645         | 0.9928             | 0.9990         | 0.2425              | 0.2869                  | 0.3301              |
| 15     | PDIA3    | h-0.5  | 0.9641         | 0.9923             | 0.9989         | 0.2422              | 0.2854                  | 0.3267              |
| 15     | PEX11A   | h-0.5  | 0.9113         | 0.9877             | 0.9990         | 0.2085              | 0.2730                  | 0.3310              |
| 15     | SLC28A2  | h-0.5  | 0.9498         | 0.9913             | 0.9991         | 0.2300              | 0.2826                  | 0.3326              |
| 15     | SNRPN    | h-0.5  | 0.9585         | 0.9948             | 0.9997         | 0.2368              | 0.2954                  | 0.3536              |
| 15     | TMEM87A  | h-0.5  | 0.9278         | 0.9893             | 0.9991         | 0.2169              | 0.2767                  | 0.3334              |
| 15     | ZNF690   | h-0.5  | 0.9388         | 0.9757             | 0.9923         | 0.2251              | 0.2533                  | 0.2824              |
| 15     | ARIH1    | h-0.95 | 0.9877         | 0.9989             | 0.9999         | 0.2728              | 0.3290                  | 0.3828              |
| 15     | CDAN1    | h-0.95 | 0.9959         | 0.9996             | 1.0000         | 0.3016              | 0.3500                  | 0.3959              |
| 15     | DUOX2    | h-0.95 | 1.0000         | 1.0000             | 1.0000         | 0.3899              | 0.4480                  | 0.4977              |
| 15     | FRMD5    | h-0.95 | 0.9892         | 0.9988             | 0.9999         | 0.2784              | 0.3275                  | 0.3731              |
| 15     | NIP      | h-0.95 | 0.9729         | 0.9973             | 0.9999         | 0.2507              | 0.3107                  | 0.3657              |
| 15     | RBPMS2   | h-0.95 | 0.9911         | 0.9989             | 0.9999         | 0.2832              | 0.3304                  | 0.3761              |
| 15     | SLC24A5  | h-0.95 | 0.9757         | 0.9959             | 0.9996         | 0.2545              | 0.3008                  | 0.3466              |
| 15     | SPATA5L1 | h-0.95 | 0.9700         | 0.9995             | 1.0000         | 0.2462              | 0.3471                  | 0.4295              |
| 15     | TP53BP1  | h-0.95 | 0.9939         | 0.9992             | 0.9999         | 0.2933              | 0.3369                  | 0.3800              |
| 15     | TRIP4    | h-0.95 | 0.9866         | 0.9987             | 0.9999         | 0.2710              | 0.3257                  | 0.3788              |
| 16     | HAS3     | l-0.5  | 0.0011         | 0.0091             | 0.0560         | -0.1321             | -0.0778                 | -0.0154             |
| 16     | ADAT1    | h-0.5  | 0.9233         | 0.9847             | 0.9983         | 0.2271              | 0.2832                  | 0.3398              |
| 16     | ARHGAP17 | h-0.5  | 0.8884         | 0.9775             | 0.9973         | 0.2099              | 0.2710                  | 0.3289              |
| 16     | C16orf34 | h-0.5  | 0.8907         | 0.9787             | 0.9975         | 0.2115              | 0.2726                  | 0.3301              |
| 16     | CCL22    | h-0.5  | 0.8749         | 0.9819             | 0.9985         | 0.2047              | 0.2782                  | 0.3424              |
| 16     | FLJ20581 | h-0.5  | 0.9630         | 0.9931             | 0.9992         | 0.2543              | 0.3059                  | 0.3564              |
| 16     | LONPL    | h-0.5  | 0.9167         | 0.9857             | 0.9984         | 0.2237              | 0.2851                  | 0.3405              |
| 16     | LRRC36   | h-0.5  | 0.9125         | 0.9859             | 0.9987         | 0.2214              | 0.2854                  | 0.3454              |

Continued on next page

TABLE S5 – continued from previous page

| Chrom. | Gene      | Class. | Quant.<br>(lb) | Quant.<br>(median) | Quant.<br>(ub) | $\phi_{ST}$<br>(lb) | $\phi_{ST}$<br>(median) | $\phi_{ST}$<br>(ub) |
|--------|-----------|--------|----------------|--------------------|----------------|---------------------|-------------------------|---------------------|
| 16     | MGC33367  | h-0.5  | 0.9190         | 0.9803             | 0.9968         | 0.2247              | 0.2753                  | 0.3238              |
| 16     | MPFL      | h-0.5  | 0.9211         | 0.9761             | 0.9947         | 0.2263              | 0.2692                  | 0.3106              |
| 16     | SPIN1     | h-0.5  | 0.9085         | 0.9892             | 0.9994         | 0.2188              | 0.2934                  | 0.3623              |
| 16     | TRAF7     | h-0.5  | 0.8984         | 0.9771             | 0.9970         | 0.2147              | 0.2706                  | 0.3267              |
| 16     | ZNF23     | h-0.5  | 0.9333         | 0.9962             | 0.9999         | 0.2322              | 0.3217                  | 0.3969              |
| 16     | ABCC12    | h-0.95 | 0.9821         | 0.9981             | 0.9999         | 0.2796              | 0.3377                  | 0.3919              |
| 16     | CCL17     | h-0.95 | 0.9877         | 0.9987             | 0.9999         | 0.2904              | 0.3469                  | 0.3991              |
| 16     | CORO7     | h-0.95 | 0.9854         | 0.9986             | 0.9999         | 0.2849              | 0.3454                  | 0.4005              |
| 16     | CREBBP    | h-0.95 | 0.9904         | 0.9995             | 1.0000         | 0.2973              | 0.3667                  | 0.4290              |
| 16     | GABARAPL2 | h-0.95 | 0.9817         | 0.9983             | 0.9999         | 0.2788              | 0.3404                  | 0.3962              |
| 16     | GLIS2     | h-0.95 | 0.9931         | 0.9992             | 0.9999         | 0.3074              | 0.3586                  | 0.4062              |
| 16     | PLEKHG4   | h-0.95 | 0.9993         | 1.0000             | 1.0000         | 0.3621              | 0.4125                  | 0.4598              |
| 16     | POLR3E    | h-0.95 | 0.9665         | 0.9977             | 0.9999         | 0.2579              | 0.3339                  | 0.4015              |
| 16     | SLC9A5    | h-0.95 | 0.9974         | 0.9999             | 1.0000         | 0.3318              | 0.3985                  | 0.4603              |
| 17     | TUSC5     | l-0.5  | 0.0047         | 0.0207             | 0.0685         | -0.0761             | -0.0376                 | 0.0015              |
| 17     | ADORA2B   | h-0.5  | 0.9079         | 0.9800             | 0.9978         | 0.2013              | 0.2512                  | 0.3036              |
| 17     | CASC3     | h-0.5  | 0.9093         | 0.9876             | 0.9991         | 0.2019              | 0.2643                  | 0.3230              |
| 17     | CD300LF   | h-0.5  | 0.9182         | 0.9817             | 0.9975         | 0.2062              | 0.2535                  | 0.3021              |
| 17     | CDR2L     | h-0.5  | 0.9264         | 0.9908             | 0.9994         | 0.2094              | 0.2717                  | 0.3298              |
| 17     | DDX5      | h-0.5  | 0.8575         | 0.9949             | 1.0000         | 0.1829              | 0.2859                  | 0.3739              |
| 17     | ERN1      | h-0.5  | 0.9634         | 0.9917             | 0.9988         | 0.2343              | 0.2743                  | 0.3163              |
| 17     | ET        | h-0.5  | 0.9080         | 0.9885             | 0.9993         | 0.2016              | 0.2662                  | 0.3271              |
| 17     | GRB2      | h-0.5  | 0.9599         | 0.9926             | 0.9992         | 0.2309              | 0.2771                  | 0.3224              |
| 17     | KIAA1618  | h-0.5  | 0.9183         | 0.9776             | 0.9960         | 0.2066              | 0.2480                  | 0.2901              |
| 17     | NDEL1     | h-0.5  | 0.8524         | 0.9774             | 0.9984         | 0.1820              | 0.2477                  | 0.3106              |
| 17     | NLGN2     | h-0.5  | 0.9421         | 0.9899             | 0.9989         | 0.2189              | 0.2693                  | 0.3183              |
| 17     | RSAD1     | h-0.5  | 0.8919         | 0.9862             | 0.9990         | 0.1947              | 0.2614                  | 0.3193              |
| 17     | SCARF1    | h-0.5  | 0.9176         | 0.9853             | 0.9986         | 0.2056              | 0.2597                  | 0.3129              |
| 17     | TTC25     | h-0.5  | 0.8478         | 0.9839             | 0.9992         | 0.1797              | 0.2571                  | 0.3250              |

Continued on next page



TABLE S5 – continued from previous page

| Chrom. | Gene      | Class. | Quant.<br>(lb) | Quant.<br>(median) | Quant.<br>(ub) | $\phi_{ST}$<br>(lb) | $\phi_{ST}$<br>(median) | $\phi_{ST}$<br>(ub) |
|--------|-----------|--------|----------------|--------------------|----------------|---------------------|-------------------------|---------------------|
| 17     | ZNF232    | h-0.5  | 0.9295         | 0.9856             | 0.9983         | 0.2115              | 0.2604                  | 0.3080              |
| 17     | AATF      | h-0.95 | 0.9977         | 0.9998             | 1.0000         | 0.3051              | 0.3484                  | 0.3962              |
| 17     | C17orf64  | h-0.95 | 0.9999         | 1.0000             | 1.0000         | 0.3710              | 0.4266                  | 0.4791              |
| 17     | CENTA2    | h-0.95 | 0.9763         | 0.9973             | 0.9999         | 0.2473              | 0.3002                  | 0.3529              |
| 17     | CSNK1D    | h-0.95 | 0.9919         | 0.9995             | 1.0000         | 0.2754              | 0.3355                  | 0.3891              |
| 17     | DERL2     | h-0.95 | 0.9941         | 0.9995             | 1.0000         | 0.2832              | 0.3350                  | 0.3831              |
| 17     | G6PC      | h-0.95 | 0.9675         | 0.9953             | 0.9996         | 0.2367              | 0.2881                  | 0.3382              |
| 17     | GNA13     | h-0.95 | 0.9927         | 0.9995             | 1.0000         | 0.2782              | 0.3348                  | 0.3885              |
| 17     | ITGAE     | h-0.95 | 0.9968         | 0.9999             | 1.0000         | 0.2965              | 0.3706                  | 0.4349              |
| 17     | PRPF8     | h-0.95 | 0.9816         | 0.9978             | 0.9999         | 0.2539              | 0.3047                  | 0.3557              |
| 17     | TTC19     | h-0.95 | 0.9934         | 0.9996             | 1.0000         | 0.2813              | 0.3379                  | 0.3916              |
| 17     | USP32     | h-0.95 | 0.9955         | 0.9999             | 1.0000         | 0.2885              | 0.3654                  | 0.4355              |
| 17     | WDR68     | h-0.95 | 0.9936         | 0.9996             | 1.0000         | 0.2810              | 0.3392                  | 0.3897              |
| 18     | ANKRD30B  | l-0.5  | 0.0043         | 0.0219             | 0.0782         | -0.0497             | -0.0194                 | 0.0130              |
| 18     | C18orf10  | l-0.5  | 0.0001         | 0.0031             | 0.0419         | -0.1105             | -0.0594                 | -0.0030             |
| 18     | SERPINB12 | l-0.5  | 0.0008         | 0.0138             | 0.1152         | -0.0809             | -0.0295                 | 0.0253              |
| 18     | GATA6     | h-0.5  | 0.9591         | 0.9941             | 0.9996         | 0.1882              | 0.2291                  | 0.2702              |
| 18     | GNAL      | h-0.5  | 0.8948         | 0.9777             | 0.9970         | 0.1617              | 0.2019                  | 0.2391              |
| 18     | KIAA1328  | h-0.5  | 0.9065         | 0.9869             | 0.9992         | 0.1653              | 0.2128                  | 0.2610              |
| 18     | ME2       | h-0.5  | 0.8918         | 0.9802             | 0.9983         | 0.1593              | 0.2045                  | 0.2502              |
| 18     | KIAA1772  | h-0.95 | 0.9898         | 0.9997             | 1.0000         | 0.2174              | 0.2765                  | 0.3330              |
| 18     | PSMA8     | h-0.95 | 0.9796         | 0.9980             | 0.9999         | 0.2043              | 0.2484                  | 0.2909              |
| 18     | RTTN      | h-0.95 | 0.9898         | 0.9995             | 1.0000         | 0.2183              | 0.2688                  | 0.3188              |
| 18     | TXNDC10   | h-0.95 | 0.9982         | 1.0000             | 1.0000         | 0.2497              | 0.3032                  | 0.3559              |
| 19     | FLJ23447  | l-0.5  | 0.0005         | 0.0130             | 0.1581         | -0.1151             | -0.0449                 | 0.0347              |
| 19     | MYBPC2    | l-0.5  | 0.0073         | 0.0239             | 0.0674         | -0.0575             | -0.0288                 | 0.0017              |
| 19     | SFRS16    | l-0.5  | 0.0050         | 0.0195             | 0.0612         | -0.0651             | -0.0343                 | -0.0013             |
| 19     | ZNF599    | l-0.5  | 0.0018         | 0.0110             | 0.0486         | -0.0873             | -0.0490                 | -0.0082             |
| 19     | BPY2IP1   | h-0.5  | 0.9530         | 0.9955             | 0.9998         | 0.2065              | 0.2650                  | 0.3216              |

Continued on next page

TABLE S5 – continued from previous page

| Chrom. | Gene      | Class. | Quant.<br>(lb) | Quant.<br>(median) | Quant.<br>(ub) | $\phi_{ST}$<br>(lb) | $\phi_{ST}$<br>(median) | $\phi_{ST}$<br>(ub) |
|--------|-----------|--------|----------------|--------------------|----------------|---------------------|-------------------------|---------------------|
| 19     | C19orf25  | h-0.5  | 0.8690         | 0.9769             | 0.9980         | 0.1713              | 0.2264                  | 0.2813              |
| 19     | CBLC      | h-0.5  | 0.9506         | 0.9935             | 0.9995         | 0.2049              | 0.2568                  | 0.3073              |
| 19     | DDX49     | h-0.5  | 0.8839         | 0.9773             | 0.9973         | 0.1760              | 0.2269                  | 0.2747              |
| 19     | EEF2      | h-0.5  | 0.8921         | 0.9756             | 0.9969         | 0.1795              | 0.2249                  | 0.2717              |
| 19     | EMR1      | h-0.5  | 0.9506         | 0.9897             | 0.9986         | 0.2059              | 0.2463                  | 0.2866              |
| 19     | EPN1      | h-0.5  | 0.9660         | 0.9949             | 0.9996         | 0.2165              | 0.2622                  | 0.3069              |
| 19     | FCAR      | h-0.5  | 0.8873         | 0.9835             | 0.9987         | 0.1772              | 0.2351                  | 0.2895              |
| 19     | GTF2F1    | h-0.5  | 0.9585         | 0.9937             | 0.9994         | 0.2102              | 0.2578                  | 0.3025              |
| 19     | LIM2      | h-0.5  | 0.9221         | 0.9916             | 0.9996         | 0.1906              | 0.2511                  | 0.3098              |
| 19     | LOC115098 | h-0.5  | 0.9420         | 0.9908             | 0.9992         | 0.2004              | 0.2493                  | 0.2969              |
| 19     | LOC126208 | h-0.5  | 0.9280         | 0.9912             | 0.9994         | 0.1930              | 0.2501                  | 0.3027              |
| 19     | MAP4K1    | h-0.5  | 0.9053         | 0.9799             | 0.9973         | 0.1840              | 0.2300                  | 0.2741              |
| 19     | MGC11271  | h-0.5  | 0.9626         | 0.9926             | 0.9992         | 0.2137              | 0.2541                  | 0.2957              |
| 19     | PGPEP1    | h-0.5  | 0.9147         | 0.9859             | 0.9988         | 0.1873              | 0.2390                  | 0.2894              |
| 19     | PIAS4     | h-0.5  | 0.9618         | 0.9946             | 0.9996         | 0.2131              | 0.2611                  | 0.3074              |
| 19     | PPP1R15A  | h-0.5  | 0.9009         | 0.9758             | 0.9963         | 0.1824              | 0.2253                  | 0.2681              |
| 19     | PRKCSH    | h-0.5  | 0.8978         | 0.9827             | 0.9984         | 0.1808              | 0.2339                  | 0.2852              |
| 19     | RASGRP4   | h-0.5  | 0.9242         | 0.9823             | 0.9972         | 0.1918              | 0.2332                  | 0.2741              |
| 19     | TNPO2     | h-0.5  | 0.9010         | 0.9833             | 0.9986         | 0.1820              | 0.2346                  | 0.2871              |
| 19     | TYROBP    | h-0.5  | 0.6729         | 0.9752             | 0.9994         | 0.1284              | 0.2245                  | 0.3048              |
| 19     | ZNF444    | h-0.5  | 0.9335         | 0.9857             | 0.9980         | 0.1960              | 0.2388                  | 0.2799              |
| 19     | ZNF560    | h-0.5  | 0.9269         | 0.9905             | 0.9994         | 0.1925              | 0.2485                  | 0.3039              |
| 19     | ZNF653    | h-0.5  | 0.9179         | 0.9932             | 0.9998         | 0.1884              | 0.2560                  | 0.3192              |
| 19     | ARHGEF1   | h-0.95 | 0.9832         | 0.9990             | 1.0000         | 0.2348              | 0.2938                  | 0.3495              |
| 19     | CDC34     | h-0.95 | 0.9784         | 0.9961             | 0.9995         | 0.2290              | 0.2677                  | 0.3053              |
| 19     | CNN1      | h-0.95 | 0.9996         | 1.0000             | 1.0000         | 0.3092              | 0.3651                  | 0.4170              |
| 19     | FKBP8     | h-0.95 | 0.9974         | 1.0000             | 1.0000         | 0.2755              | 0.3567                  | 0.4256              |
| 19     | LOC112703 | h-0.95 | 0.9694         | 0.9975             | 0.9999         | 0.2187              | 0.2771                  | 0.3310              |
| 19     | PSMC4     | h-0.95 | 0.9700         | 0.9961             | 0.9997         | 0.2196              | 0.2678                  | 0.3142              |

Continued on next page

TABLE S5 – continued from previous page

| Chrom. | Gene     | Class. | Quant.<br>(lb) | Quant.<br>(median) | Quant.<br>(ub) | $\phi_{ST}$<br>(lb) | $\phi_{ST}$<br>(median) | $\phi_{ST}$<br>(ub) |
|--------|----------|--------|----------------|--------------------|----------------|---------------------|-------------------------|---------------------|
| 19     | SAMD4B   | h-0.95 | 0.9939         | 0.9998             | 1.0000         | 0.2580              | 0.3197                  | 0.3779              |
| 19     | ZNF440L  | h-0.95 | 0.9952         | 0.9998             | 1.0000         | 0.2639              | 0.3204                  | 0.3741              |
| 19     | ZNF93    | h-0.95 | 0.9660         | 0.9985             | 1.0000         | 0.2155              | 0.2869                  | 0.3506              |
| 19     | ZNRF4    | h-0.95 | 0.9748         | 0.9983             | 0.9999         | 0.2243              | 0.2847                  | 0.3394              |
| 20     | BCAS4    | h-0.5  | 0.9511         | 0.9871             | 0.9982         | 0.2194              | 0.2588                  | 0.3027              |
| 20     | CST9     | h-0.5  | 0.9204         | 0.9826             | 0.9976         | 0.2023              | 0.2507                  | 0.2971              |
| 20     | DEFB123  | h-0.5  | 0.9249         | 0.9947             | 0.9999         | 0.2038              | 0.2810                  | 0.3526              |
| 20     | FLJ33706 | h-0.5  | 0.9489         | 0.9961             | 0.9999         | 0.2175              | 0.2880                  | 0.3500              |
| 20     | PDYN     | h-0.5  | 0.9562         | 0.9901             | 0.9985         | 0.2238              | 0.2653                  | 0.3060              |
| 20     | RNPC1    | h-0.5  | 0.9103         | 0.9812             | 0.9974         | 0.1979              | 0.2481                  | 0.2950              |
| 20     | STK35    | h-0.5  | 0.9651         | 0.9938             | 0.9993         | 0.2313              | 0.2767                  | 0.3207              |
| 20     | AHCY     | h-0.95 | 0.9995         | 1.0000             | 1.0000         | 0.3291              | 0.4079                  | 0.4767              |
| 20     | BCL2L1   | h-0.95 | 0.9709         | 0.9941             | 0.9992         | 0.2373              | 0.2781                  | 0.3197              |
| 20     | C20orf4  | h-0.95 | 0.9998         | 1.0000             | 1.0000         | 0.3469              | 0.4151                  | 0.4748              |
| 20     | CBLN4    | h-0.95 | 0.9986         | 0.9999             | 1.0000         | 0.3127              | 0.3579                  | 0.3995              |
| 20     | HM13     | h-0.95 | 0.9999         | 1.0000             | 1.0000         | 0.3653              | 0.4175                  | 0.4648              |
| 20     | PSMA7    | h-0.95 | 0.9946         | 0.9994             | 1.0000         | 0.2818              | 0.3277                  | 0.3707              |
| 20     | SRMS     | h-0.95 | 0.9688         | 0.9952             | 0.9996         | 0.2337              | 0.2834                  | 0.3308              |
| 20     | TPX2     | h-0.95 | 0.9697         | 0.9956             | 0.9997         | 0.2356              | 0.2848                  | 0.3349              |
| 21     | BRWD1    | l-0.5  | 0.0016         | 0.0211             | 0.1346         | -0.0542             | -0.0123                 | 0.0316              |
| 21     | CHODL    | h-0.5  | 0.7998         | 0.9759             | 0.9990         | 0.1226              | 0.1753                  | 0.2261              |
| 21     | NDUFV3   | h-0.5  | 0.9511         | 0.9941             | 0.9997         | 0.1615              | 0.2003                  | 0.2384              |
| 21     | USP16    | h-0.5  | 0.8572         | 0.9769             | 0.9984         | 0.1334              | 0.1761                  | 0.2187              |
| 21     | C21orf33 | h-0.95 | 0.9733         | 0.9976             | 0.9999         | 0.1743              | 0.2142                  | 0.2534              |
| 21     | DSCR8    | h-0.95 | 0.9715         | 0.9981             | 1.0000         | 0.1715              | 0.2174                  | 0.2606              |
| 21     | MRAP     | h-0.95 | 0.9902         | 0.9994             | 1.0000         | 0.1914              | 0.2332                  | 0.2736              |
| 22     | PDGFB    | l-0.5  | 0.0049         | 0.0232             | 0.0820         | -0.0823             | -0.0425                 | -0.0000             |
| 22     | ADRBK2   | h-0.5  | 0.9624         | 0.9939             | 0.9994         | 0.2303              | 0.2791                  | 0.3269              |
| 22     | CARD10   | h-0.5  | 0.9206         | 0.9815             | 0.9969         | 0.2042              | 0.2501                  | 0.2928              |

Continued on next page

TABLE S5 – continued from previous page

| Chrom. | Gene      | Class. | Quant.<br>(lb) | Quant.<br>(median) | Quant.<br>(ub) | $\phi_{ST}$<br>(lb) | $\phi_{ST}$<br>(median) | $\phi_{ST}$<br>(ub) |
|--------|-----------|--------|----------------|--------------------|----------------|---------------------|-------------------------|---------------------|
| 22     | FAM83F    | h-0.5  | 0.8972         | 0.9915             | 0.9997         | 0.1924              | 0.2711                  | 0.3406              |
| 22     | LIF       | h-0.5  | 0.7590         | 0.9832             | 0.9995         | 0.1523              | 0.2531                  | 0.3337              |
| 22     | ZNF278    | h-0.5  | 0.9363         | 0.9899             | 0.9992         | 0.2118              | 0.2670                  | 0.3202              |
| 22     | FLJ10945  | h-0.95 | 0.9759         | 0.9956             | 0.9995         | 0.2442              | 0.2871                  | 0.3283              |
| 22     | FLJ20699  | h-0.95 | 0.9802         | 0.9994             | 1.0000         | 0.2476              | 0.3275                  | 0.3993              |
| 22     | FLJ27365  | h-0.95 | 0.9739         | 0.9937             | 0.9990         | 0.2419              | 0.2787                  | 0.3157              |
| 22     | MMP11     | h-0.95 | 0.9848         | 0.9986             | 0.9999         | 0.2565              | 0.3119                  | 0.3625              |
| 22     | PKDREJ    | h-0.95 | 1.0000         | 1.0000             | 1.0000         | 0.3964              | 0.4547                  | 0.5044              |
| 22     | ZBED4     | h-0.95 | 0.9974         | 0.9998             | 1.0000         | 0.3005              | 0.3498                  | 0.3996              |
| X      | CRSP2     | h-0.5  | 0.9387         | 0.9837             | 0.9971         | 0.2888              | 0.3411                  | 0.3935              |
| X      | EDA2R     | h-0.5  | 0.9130         | 0.9907             | 0.9996         | 0.2697              | 0.3607                  | 0.4439              |
| X      | FLJ20298  | h-0.5  | 0.8873         | 0.9848             | 0.9990         | 0.2563              | 0.3435                  | 0.4233              |
| X      | HEPH      | h-0.5  | 0.9445         | 0.9910             | 0.9991         | 0.2930              | 0.3618                  | 0.4247              |
| X      | IGBP1     | h-0.5  | 0.9262         | 0.9779             | 0.9951         | 0.2806              | 0.3297                  | 0.3778              |
| X      | ITIH5L    | h-0.5  | 0.9379         | 0.9912             | 0.9993         | 0.2863              | 0.3625                  | 0.4313              |
| X      | LOC158957 | h-0.5  | 0.9322         | 0.9817             | 0.9967         | 0.2833              | 0.3369                  | 0.3886              |
| X      | NRK       | h-0.5  | 0.8801         | 0.9806             | 0.9981         | 0.2524              | 0.3348                  | 0.4065              |
| X      | PRRG1     | h-0.5  | 0.9661         | 0.9961             | 0.9998         | 0.3144              | 0.3877                  | 0.4564              |
| X      | AR        | h-0.95 | 0.9983         | 0.9998             | 1.0000         | 0.4152              | 0.4645                  | 0.5098              |
| X      | GNL3L     | h-0.95 | 0.9762         | 0.9980             | 0.9999         | 0.3276              | 0.4068                  | 0.4786              |
| X      | GPKOW     | h-0.95 | 0.9983         | 1.0000             | 1.0000         | 0.4117              | 0.4910                  | 0.5563              |
| X      | MSN       | h-0.95 | 0.9834         | 0.9985             | 0.9999         | 0.3410              | 0.4138                  | 0.4804              |
| X      | PHKA1     | h-0.95 | 0.9713         | 0.9954             | 0.9995         | 0.3207              | 0.3828                  | 0.4396              |
| X      | RPL10     | h-0.95 | 0.9726         | 0.9957             | 0.9996         | 0.3227              | 0.3850                  | 0.4414              |
| X      | TSC22D3   | h-0.95 | 0.9724         | 0.9968             | 0.9998         | 0.3217              | 0.3930                  | 0.4590              |
